# Slow oscillation-spindle coupling strength predicts real-life gross-motor learning in adolescents and adults

Michael A. Hahn<sup>1,2,3,4</sup>, Kathrin Bothe<sup>1,2</sup>, Dominik P. J. Heib<sup>1,2</sup>, Manuel Schabus<sup>1,2</sup>,  
Randolph F. Helfrich<sup>3</sup>, Kerstin Hoedlmoser<sup>1,2\*</sup>

<sup>1</sup> *Department of Psychology, Laboratory for Sleep, Cognition and Consciousness Research, University of Salzburg, Hellbrunner Strasse 34, 5020 Salzburg*

<sup>2</sup> *Centre for Cognitive Neuroscience Salzburg (CCNS), University of Salzburg, Hellbrunner Strasse 34, 5020 Salzburg*

<sup>3</sup> *Hertie-Institute for Clinical Brain Research, University of Tübingen, Hoppe-Seyler-Str. 3, 72076 Tübingen, Germany*

<sup>4</sup> *Lead contact*

*\* Corresponding authors*

## Contact Info

Michael A. Hahn, Hertie-Institute for Clinical Brain Research, University of Tübingen, Hoppe-Seyler-Str. 3, 72076 Tübingen, Germany

Email: michael.andreas.hahn@gmail.com

Kerstin Hoedlmoser, Department of Psychology, Centre for Cognitive Neuroscience Salzburg (CCNS), University of Salzburg, Hellbrunner Strasse 34, 5020 Salzburg, Austria, Phone: +43 662 8044 5143.

Email: kerstin.hoedlmoser@sbg.ac.at

## 1 **ABSTRACT**

2           Previously, we demonstrated that precise temporal coordination between slow  
3 oscillations (SO) and sleep spindles indexes declarative memory network development  
4 (Hahn et al., 2020). However, it is unclear whether these findings in the declarative  
5 memory domain also apply in the motor memory domain. Here, we compared  
6 adolescents and adults learning juggling, a real-life gross-motor task. We found that  
7 improved task proficiency after sleep lead to an attenuation of the learning curve,  
8 suggesting a dynamic juggling learning process. We employed individualized cross-  
9 frequency coupling analyses to reduce inter and intra-group variability of oscillatory  
10 features. Advancing our previous findings, we identified a more precise SO-spindle  
11 coupling in adults compared to adolescents. Importantly, coupling precision over motor  
12 areas predicted overnight changes in task proficiency and learning curve, indicating  
13 that SO-spindle coupling is sensitive to the dynamic motor learning process. Our  
14 results provide first evidence that regionally specific precisely coupled sleep  
15 oscillations support gross-motor learning.

16

17

18

19

20

21

22

23

24

## 25 INTRODUCTION

26 Sleep actively supports learning (Diekelmann & Born, 2010). The influential  
27 active system consolidation theory suggests that long-term consolidation of memories  
28 during sleep is driven by a precise temporal interplay between sleep spindles and slow  
29 oscillations (Diekelmann & Born, 2010; Klinzing et al., 2019). Memories acquired  
30 during wakefulness are reactivated in the hippocampus during sharp-wave ripple  
31 events in sleep (Wilson & McNaughton, 1994; Zhang et al., 2018). These events are  
32 nested within thalamo-cortical sleep spindles that mediate synaptic plasticity (Niethard  
33 et al., 2018; Rosanova & Ulrich, 2005). Sleep spindles in turn are thought to be  
34 facilitated by the depolarizing phase of cortical slow oscillations (SO) thereby forming  
35 slow oscillation-spindle complexes during which the subcortical-cortical network  
36 communication is optimal for information transfer (Chauvette et al., 2012; Clemens et  
37 al., 2011; Helfrich et al., 2019; Helfrich et al., 2018; Latchoumane et al., 2017; Molle et  
38 al., 2011; Ngo et al., 2020; Niethard et al., 2018; Schreiner et al., 2021; Staresina et  
39 al., 2015).

40 Several lines of research recently demonstrated that precisely timed SO-spindle  
41 interaction mediates successful memory consolidation across the lifespan (Hahn et al.,  
42 2020; Helfrich et al., 2018; Mikutta et al., 2019; Molle et al., 2011; Muehlroth et al.,  
43 2019). In our recent longitudinal work, we found that SO-spindle coordination was not  
44 only becoming more consistent from childhood to late adolescence but also directly  
45 predicted enhancements in declarative memory formation across those formative  
46 years (Hahn et al., 2020). However, because the active system consolidation theory  
47 assumes a crucial role of hippocampal memory replay for sleep-dependent memory  
48 consolidation, most studies, including our own, focused on the effect of SO-spindle  
49 coupling on hippocampus-dependent declarative memory consolidation. Therefore,

50 the role of SO-spindle coordination for motor learning or consolidation of procedural  
51 information remains poorly understood.

52 While sleep's beneficial role for motor memory formation has been extensively  
53 investigated and frequently related to individual oscillatory activity of sleep spindles  
54 and SO (Barakat et al., 2011; Boutin et al., 2018; Fogel et al., 2017; Huber et al., 2004;  
55 King et al., 2017; Nishida & Walker, 2007; Pinsard et al., 2019; Tamaki et al., 2013;  
56 Tamaki et al., 2008; Vahdat et al., 2017; Walker et al., 2002), there is little empirical  
57 evidence for the involvement of the timed interplay between spindles and SO. In  
58 rodents, the neuronal firing pattern in the motor cortex was more coherent during  
59 spindles with close temporal proximity to SOs after engaging in a grasping motor task  
60 (Silversmith et al., 2020). In humans, stronger SO-spindle coupling related to higher  
61 accuracy during mirror tracing, a motor adaption task where subjects trace the line of  
62 a shape while looking through a mirror (Mikutta et al., 2019). So far, research focused  
63 on laboratory suitable fine-motor sequence learning or motor adaption tasks, which  
64 has hampered our understanding of memory consolidation for more ecologically valid  
65 gross-motor abilities that are crucial for our everyday life (for a review see King et al.  
66 (2017)).

67 Only few studies have investigated the effect of sleep on complex real-life motor  
68 tasks. Overnight performance benefits for riding an inverse steering bike have been  
69 shown to be related to spindle activity in adolescents and adults (Bothe et al., 2019;  
70 Bothe et al., 2020). Similarly, juggling performance was supported by sleep and  
71 juggling training induced power increments in the spindle and SO frequency range  
72 during a nap (Morita et al., 2012, 2016). Remarkably, juggling has been found to induce  
73 lasting structural changes in the hippocampus and mid-temporal areas outside of the  
74 motor network (Boyke et al., 2008; Draganski et al., 2004), making it a promising  
75 expedient to probe the active system consolidation framework for gross-motor

76 memory. Importantly, this complex gross-motor skill demands accurately executed  
77 movements that are coordinated by integrating visual, sensory and motor information.  
78 Yet, it remains unclear whether learning of these precisely coordinated movements  
79 demand an equally precise temporal interplay within memory networks during sleep.

80         Previously, we demonstrated that SO and spindles become more tightly coupled  
81 across brain maturation which predicts declarative memory formation enhancements  
82 (Hahn et al., 2020). Here we expand on our initial findings by investigating early  
83 adolescents and young adults learning how to juggle as real-life complex gross-motor  
84 task. We first sought to complete the picture of SO-spindle coupling strength  
85 development across brain maturation by comparing age ranges that were not present  
86 in our initial longitudinal data set. Second, we explicitly tested the assumption that  
87 precisely coordinated SO-spindle interaction supports learning of coordinated gross-  
88 motor skills.

89         By leveraging an individualized cross-frequency coupling approach, we  
90 demonstrate that adults have a more precise interplay of SO and spindles than early  
91 adolescents. Importantly, the consistency of the SO-spindle coupling dynamic tracked  
92 the dynamic learning process of a gross-motor task.

93

## 94 **RESULTS**

95         Healthy adolescents ( $n = 28$ , age:  $13.11 \pm 0.79$  years, mean  $\pm$  SD) and young  
96 adults ( $n = 41$ , age:  $22.24 \pm 2.15$ ) performed a complex gross-motor learning task  
97 (juggling) before and after a full night retention interval as well as before and after a  
98 retention interval during wakefulness (**Figure 1**). To assess the impact of sleep on  
99 juggling performance, we divided the participants into a *sleep-first* group (i.e. sleep  
100 retention interval followed by a wake retention interval) and a *wake-first* group (i.e.

101 wake retention interval followed by a sleep retention interval). Polysomnography (PSG)  
102 was recorded during an adaptation night and during the respective sleep retention  
103 interval (i.e. learning night) except for the adult *wake-first* group (for sleep architecture  
104 descriptive parameters of the adaptation night and learning night as well as for  
105 adolescents and adults see **Supplementary file – table 1 & 2**). Participants without  
106 prior juggling experience trained to juggle for one hour. We measured the amount of  
107 successful three ball cascades (i.e. three consecutive catches) during performance  
108 tests in multiple three-minute (min) blocks (3x3 min for adolescents; 5x3 min for adults)  
109 before and after the respective retention intervals. Adolescents performed fewer blocks  
110 than adults to alleviate exhaustion from the extensive juggling training.

111

112 **Figure 1**

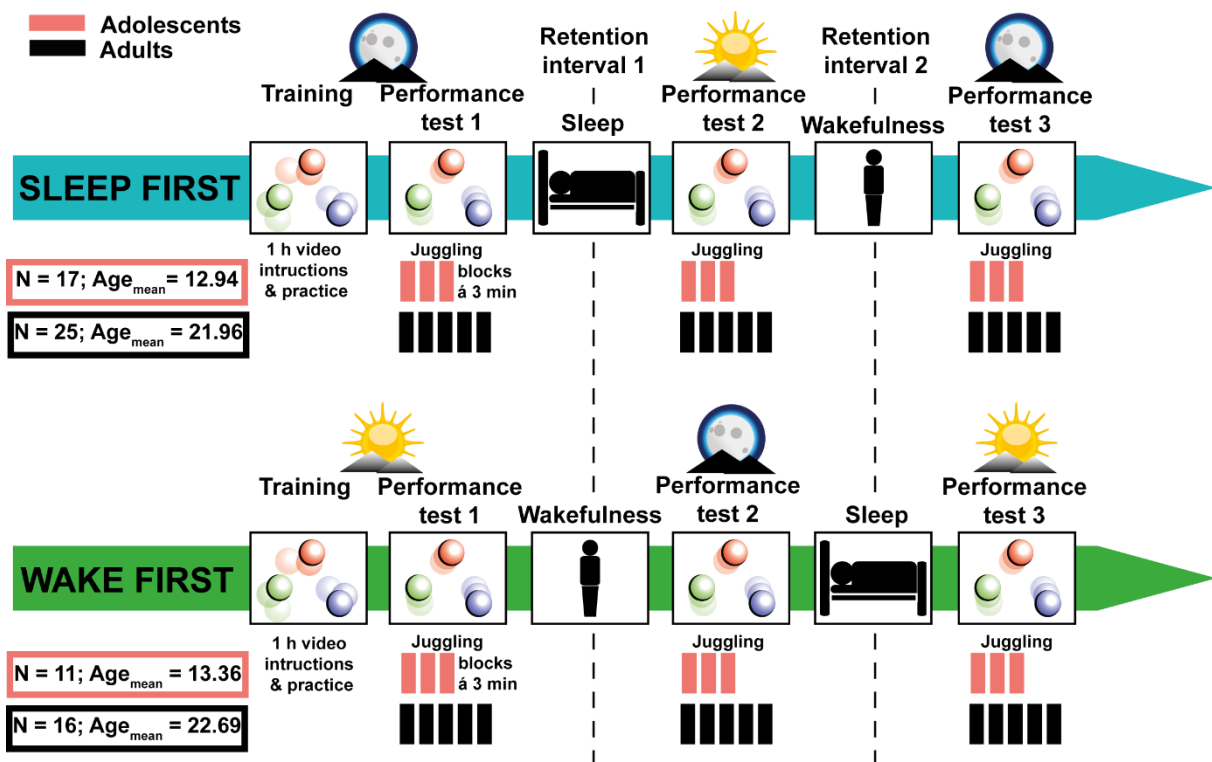

113

### 114 Study design

115 Adolescents (N = 28; 23 male) and adults (N = 41; 25 male) without prior juggling experience  
116 were divided into a *sleep-first* and a *wake-first* group. Participants in the *sleep-first* group  
117 trained to juggle for 1 hour with video instructions in the evening. Juggling performance was

118 tested before and after a retention interval containing sleep (1), followed by a third juggling test  
119 after a retention interval containing wakefulness (2). Participants in the *wake-first* group  
120 followed the same protocol but in reverse order (i.e. training in the morning, first retention  
121 interval containing wakefulness and second retention interval containing sleep).  
122 Polysomnography during an adaptation night and a learning night at the respective sleep  
123 retention interval. Psychomotor vigilance tasks were conducted before each performance test.  
124 Adolescents only performed three juggling blocks per test to avoid a too excessive training-  
125 load.

126

### 127 *Behavioral results: juggling performance and disentangling the learning process*

128 Adolescents improved their juggling performance over the course of all nine  
129 blocks (**Figure 2A top**;  $F_{3.957, 94.962} = 6.948$ ,  $p < 0.001$ ,  $\eta^2 = 0.23$ ). There was neither an  
130 overall difference in performance between the *sleep-first* and the *wake-first* group ( $F_{1, 24} = 1.002$ ,  
131  $p = 0.327$ ,  $\eta^2 = 0.04$ ), nor did they differ over the course of the juggling  
132 blocks ( $F_{3.957, 94.962} = 1.148$ ,  $p = 0.339$ ,  $\eta^2 = 0.05$ ). Similar to the adolescents, adults  
133 improved in performance across all 15 blocks (**Figure 2B top**;  $F_{4.673, 182.241} = 11.967$ ,  $p$   
134  $< 0.001$ ,  $\eta^2 = 0.24$ ), regardless of group ( $F_{4.673, 182.241} = 0.529$ ,  $p = 0.742$ ,  $\eta^2 = 0.01$ ).  
135 Further, there was no overall difference in performance between the *sleep-first* and  
136 *wake-first* groups in adults ( $F_{1, 39} = 1.398$ ,  $p = 0.244$ ,  $\eta^2 = 0.04$ ). Collectively, these  
137 results show, that participants do not reach asymptotic level juggling performance (for  
138 single subject data of good and bad performers see **Figure 2 – figure supplement**  
139 **1AB**). In other words, the gross-motor skill learning process is still in progress in  
140 adolescents and adults. Therefore, we wanted to capture the progression of the  
141 learning process, rather than absolute performance metrics (i.e. mean performance)  
142 that would underestimate the dynamics of gross-motor learning.

143 Since subjects did not asymptotic level performance, but learning was ongoing,  
144 we parameterized the juggling learning process by estimating the learning curve for  
145 each performance test using a first-degree polynomial fit to the different blocks (**Figure**  
146 **2C**; **Figure 2AB**, black lines). We considered the slope of the resulting trend as

147 learning curve. The learning process of complex motor skills is thought to consist of a  
148 fast initial learning stage during skill acquisition and a much slower skill retaining  
149 learning stage (Dayan & Cohen, 2011; Doyon & Benali, 2005). In other words, within-  
150 learning session performance gains are rapid at the beginning, but taper off with  
151 increased motor skill proficiency, resembling a power-law curve. Therefore, we also  
152 estimated the task proficiency per performance test at the first time point as predicted  
153 by the model, since the learning curve is expected to be influenced by the individual  
154 juggling aptitude. Importantly, the estimated task proficiency was comparable to the  
155 observed values in the corresponding first juggling block (performance test 1:  $\rho_s =$   
156  $.98$ ,  $p < 0.001$ ; performance test 2:  $\rho_s = .97$ ,  $p < 0.001$ ). Besides having a more  
157 accurate picture of juggling performance, this parameterization also allowed us to  
158 compare performance of adolescents and adults on a similar scale because of the  
159 different number of juggling blocks. A mixed ANOVA with the factors performance test  
160 (pre and post retention interval), condition group (*sleep-first* and *wake-first*) and age  
161 group (adolescents and adults) showed a significant interaction between performance  
162 test and condition group ( $F_{1, 65} = 4.868$ ,  $p = 0.031$ ,  $\eta^2 = 0.07$ ). This result indicates that  
163 regardless of age, the juggling learning curve becomes steeper after sleep than after  
164 wakefulness, thus indicating that sleep impacts motor learning (**Figure 2D**). No other  
165 interactions or main effects were significant (for the complete ANOVA report see  
166 **Supplementary file - table 3**). When analyzing the task proficiency before and after  
167 the first retention interval, depending on condition and age group, we found a  
168 significant interaction between condition and age group (**Figure 2E**;  $F_{1, 65} = 5.210$ ,  $p =$   
169  $0.026$ ,  $\eta^2 = 0.07$ ), showing that the adult *sleep-first* group had better overall task  
170 proficiency than the *wake-first* group, whereas the adolescent *sleep-first* group was  
171 worse than the *wake-first* group. The interaction (performance test x condition group)  
172 did not reach significance ( $F_{1, 65} = 1.882$ ,  $p = 0.175$ ,  $\eta^2 = 0.03$ ; also see **Supplementary**



173 **file - table 4**). Collectively, these results suggest that sleep influences learning of  
174 juggling as a gross motor task. **Figure 2A** and **2B** indicate that performance tests in  
175 the morning might be characterized by a steeper learning curve than the evening tests.  
176 We confirmed this observation using a linear mixed model (**Supplementary file – table**  
177 **5AB**). While this finding might also indicate a circadian influence on learning in our  
178 task, we did not find evidence for an effect on circadian sensitive psychomotor vigilance  
179 task reaction time. Neither when comparing sleep first and wake first groups (**Figure 2**  
180 **– figure supplement 1C**), nor when specifically probing evening and morning  
181 performance tests (**Supplementary file – table 5EF**).

182       Next, we further dissected the relationship between changes in the learning  
183 curve and task proficiency after the retention interval. We hypothesized, that a stronger  
184 increase in task proficiency across sleep would lead to a flatter learning curve based  
185 on the assumption that motor skill learning involves fast and slow learning stages.  
186 Indeed, we confirmed a strong negative correlation between the change (post retention  
187 values – pre retention values) in task proficiency and the change in learning curve after  
188 the retention interval (**Figure 2F**;  $\rho_s = -0.71$ ,  $p < 0.001$ ), which also remained strong  
189 after outlier removal (**Figure 2 – figure supplement 1D**). This result indicates that  
190 participants who consolidate their juggling performance after a retention interval show  
191 slower gains in performance. Note, that the flattening of the learning curve does not  
192 necessarily indicate worse learning but rather mark a more progressed learning stage.  
193 These results demonstrate a highly dynamic gross-motor skill learning process. Given  
194 that sleep influences the juggling learning curve, we aimed to determine whether sleep  
195 oscillation dynamics track the dynamics of gross-motor learning.

196 **Figure 2**

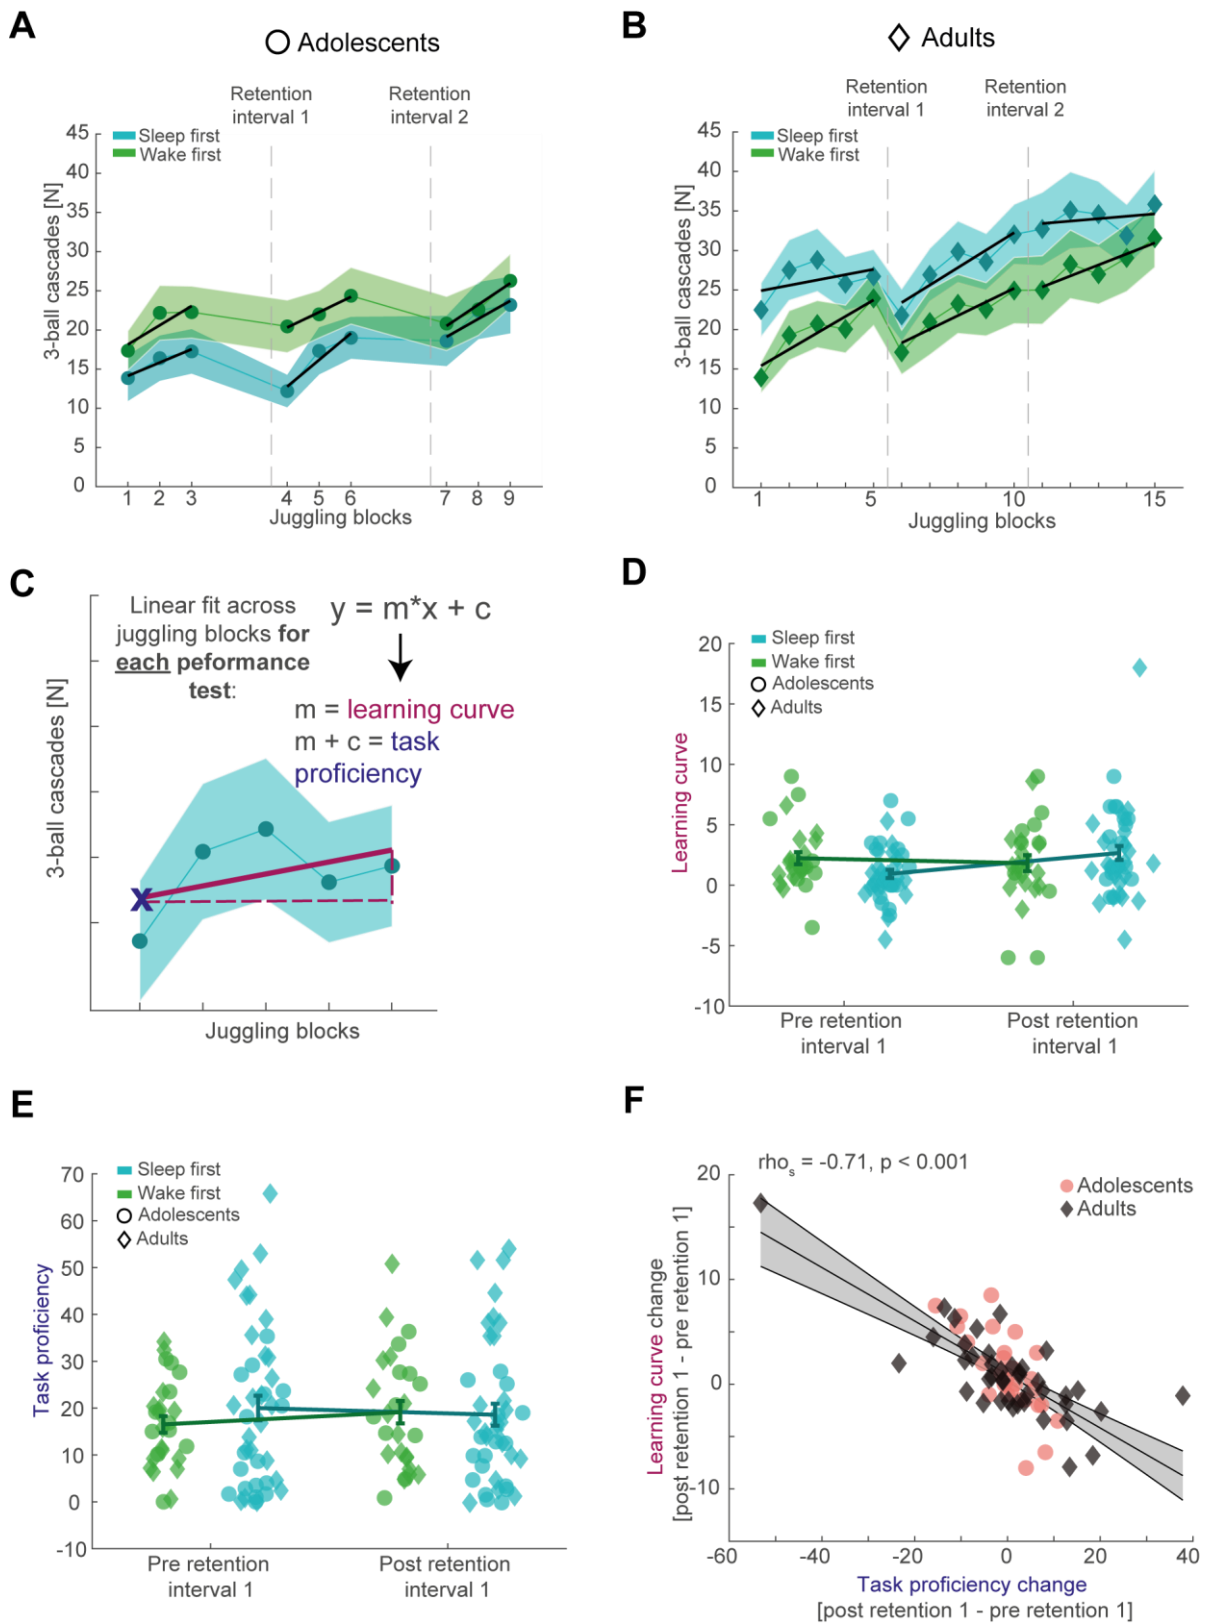

197

198 **Behavioral results and parameterizing juggling performance**

199 (A) Number of successful three-ball cascades (mean  $\pm$  standard error of the mean [SEM]) of  
200 adolescents (circles) for the *sleep-first* (blue) and *wake-first* group (green) per juggling block.

201 Grand average learning curve (black lines) as computed in (C) are superimposed. Dashed  
202 lines indicate the timing of the respective retention intervals that separate the three  
203 performance tests. Note that adolescents improve their juggling performance across the  
204 blocks. **(B)** Same conventions as in (A) but for adults (diamonds). Similar to adolescents, adults  
205 improve their juggling performance across the blocks regardless of group. **(C)** Schematic  
206 representation of the juggling learning process parameterization. We used a linear fit across  
207 all juggling blocks within a performance test to estimate the learning curve ( $m$ ) and the task  
208 proficiency (linear line equation solved for  $x = 1$ ) for each corresponding performance test. **(D)**  
209 Comparison of the juggling learning curve (mean  $\pm$  SEM) between the *sleep-first* (blue) and  
210 the *wake-first* group (green) of adolescents (circles) and adults (diamonds) before and after  
211 the first retention interval to investigate the influence of sleep. Single subject data is plotted in  
212 the corresponding group color and age icon. Participants in the *sleep-first* group showed a  
213 steeper learning curve than the *wake-first* group after the first retention interval. **(E)** Same  
214 conventions as in (D) but for the task proficiency metric. Adolescents in the *wake-first* group  
215 had better overall task proficiency than adolescents in the *sleep-first* group. Adults in the *sleep-*  
216 *first* group displayed better overall task proficiency than adults in the *wake-first* group. **(F)**  
217 Spearman rank-correlation between the overnight change in task proficiency (post – pre  
218 retention interval) and the overnight change in learning curve with robust linear trend line  
219 collapsed over the whole sample. Grey-shaded area indicates 95% confidence intervals of the  
220 trend line. Adolescents are denoted as red circles and adults as black diamonds. A strong  
221 inverse relationship indicated that participants with an improved task proficiency show flatter  
222 learning curves.  
223

#### 224 *Electrophysiological results: inter-individual variability and SO-spindle coupling*

225 To determine the nature of the timed coordination between the two cardinal  
226 sleep oscillations, we adopted the same principled individualized approach we  
227 developed earlier (Hahn et al., 2020). First, we compared oscillatory power between  
228 adolescents and adults in the frequency range between 0.1 and 20 Hz during NREM  
229 (2&3) sleep, using cluster-based permutation tests (Maris & Oostenveld, 2007).  
230 Spectral power was elevated in adolescents as compared to adults across the whole  
231 tested frequency range (**Figure 3 – figure supplement 1A left** for representative  
232 electrode Cz; cluster test:  $p < 0.001$ ,  $d = 1.88$ ). Similar to the previously reported  
233 developmental patterns of sleep oscillations from childhood to adolescence (Hahn et  
234 al., 2020), this difference was explained by a spindle frequency peak shift and  
235 broadband decrease in the fractal or  $1/f$  trend of the signal, thus directly replicating and  
236 extending our previous findings in a separate sample. After estimating the fractal

237 component of the power spectrum by means of irregular-resampling auto-spectral  
238 analysis (Wen & Liu, 2016), we found that adolescents exhibited a higher offset of  
239 fractal component on the y-axis than adults (**Figure 3 – figure supplement 1A middle**;  
240 cluster test:  $p < 0.001$ ,  $d = 1.99$ ). Next, we subtracted the fractal component from the  
241 power spectrum, which revealed clear distinct oscillatory peaks in the SO ( $< 2$  Hz) and  
242 sleep spindle range (11 – 16 Hz) for both, adolescents and adults (**Figure 3 – figure**  
243 **supplement 1A right**). Importantly, we observed the expected spatial amplitude  
244 topography with stronger frontal SO and pronounced centro-parietal spindles for both  
245 age groups (**Figure 3A left**).

246 Critically, the displayed group averages of the oscillatory residuals (**Figure 3 –**  
247 **figure supplement 1A right**) underestimate the inter-individual variability of the  
248 spindle frequency peak (**Figure 3A right**; oscillatory residuals for all subjects at Cz).  
249 Even though we found the expected systematic spindle frequency increase in a fronto-  
250 parietal cluster from adolescence to adulthood (**Figure 3 – figure supplement 1B**;  
251 cluster test:  $p = 0.002$ ,  $d = -0.87$ ), both respective age groups showed a high degree  
252 of variability of the inter-individual spindle peak.

253 Based on these findings, we separated the oscillatory activity from the fractal  
254 activity for every subject at every electrode position to capture the individual features  
255 of SO and sleep spindle oscillations. We then used the extracted individual features  
256 from the oscillatory residuals to adjust SO and spindle detection algorithms (Hahn et  
257 al., 2020; Helfrich et al., 2018; Molle et al., 2011; Staresina et al., 2015) to account for  
258 the spindle frequency peak shift and high inter-individual variability. To ensure the  
259 simultaneous presence of the two interacting sleep oscillations in the signal, we  
260 followed a conservative approach and restricted our analyses to NREM3 sleep given  
261 the low co-occurrence rate in NREM2 sleep (**Figure 3 – figure supplement 1CD**)  
262 which can cause spurious coupling estimates (Hahn et al., 2020). Further, we only

263 considered spindle events that displayed a concomitant detected SO within a 2.5 s  
264 time window.

265 We identified an underlying SO component (2 Hz low-pass filtered trace) in the  
266 spindle peak locked averages for adolescents and adults on single subject and group  
267 average basis (**Figure 3 – figure supplement 1E**), indicating a temporally precise  
268 interaction between sleep spindles and SO that is clearly discernible in the time  
269 domain.

270 To further assess the interaction between SO and sleep spindles, we computed  
271 SO-trough-locked time-frequency representations (**Figure 3 – figure supplement 1F**).  
272 Adolescents and adults revealed a shifting temporal pattern in spindle activity (11 – 16  
273 Hz) depending on the SO phase. In more detail, spindle activity decreased during the  
274 negative peak of the SO ('down-state') but increased during the positive peak ('up-  
275 state'). This temporal pattern and the underlying SO-component in spindle event  
276 detection (**Figure 3 – figure supplement 1E**) confirm the coordinated nature of the  
277 two major sleep oscillations in adolescents and adults.

278 Next, we determined the coordinated interplay between SO and spindles in  
279 more detail by analyzing individualized event-locked cross-frequency interactions  
280 (Dvorak & Fenton, 2014; Hahn et al., 2020; Helfrich et al., 2019). In brief, we extracted  
281 the instantaneous phase angle of the SO-component (< 2 Hz) corresponding to the  
282 positive spindle amplitude peak for all trials at every electrode per subject. We  
283 assessed the cross frequency coupling based on z-normalized spindle epochs (**Figure**  
284 **3B**) to alleviate potential power differences due to age (**Figure 3 – figure supplement**  
285 **1A**) or different EEG-amplifier systems that could potentially confound our analyses  
286 (Aru et al., 2015). Importantly, we found no amplitude differences around the spindle  
287 peak (point of SO-phase readout) between adolescents and adults using cluster-based  
288 random permutation testing (**Figure 3B**), indicating an unbiased analytical signal. This

289 was also the case for the SO-filtered (< 2 Hz) signal (**Figure 3B**, inset). Critically, the  
290 significant differences in amplitude from -1.4 to -0.8 s ( $p = 0.023$ ,  $d = -0.73$ ) and 0.4 to  
291 1.5 s ( $p < 0.001$ ,  $d = 1.1$ ) are not caused by age related differences in power or different  
292 EEG-systems but instead by the increased coupling strength (i.e. higher coupling  
293 precision of spindles to SOs) in adults giving rise to a more pronounced SO-wave  
294 shape when averaging across spindle peak locked epochs. Further, we specifically  
295 focused our analyses on spindle events to account for the higher variability in the  
296 spindle frequency band than in the SO-band (**Figure 3A**). Based on these adjusted  
297 phase values, we derived the coupling strength defined as  $1 - \text{circular variance}$ . This  
298 metric describes the consistency of the SO-spindle coupling (i.e. higher coupling  
299 strength indicates more precise coupling) and has previously been shown to accurately  
300 track brain development and memory formation (Hahn et al., 2020). As expected,  
301 adults had a higher coupling strength in a centro-parietal cluster than adolescents  
302 (**Figure 3C**; cluster test:  $p < 0.001$ ,  $d = 0.88$ ), indicating a more precise interplay  
303 between SO and spindles during adulthood.

304 *SO-spindle coupling tracks gross-motor learning*

305         After demonstrating that SO-spindle coupling becomes more precise from early  
306 adolescence to adulthood, we tested the hypothesis, that the dynamic interaction  
307 between the two sleep oscillations explains the dynamic process of complex gross-  
308 motor learning. When taking the behavioral analyses into account, we did not find any  
309 evidence for a difference between the two age groups on the impact of sleep on the  
310 learning curve (**Figure 2D**). Therefore, we did not differentiate between adolescents  
311 and adults in our correlational analyses. Furthermore, given that we only recorded  
312 polysomnography for the adults in the sleep first group and that adolescents in the  
313 wake first group showed enhanced task proficiency at the time point of the sleep  
314 retention interval due to additional training (**Figure 3 – figure supplement 2A**), we  
315 only considered adolescents and adults of the *sleep-first* group to ensure a similar level  
316 of juggling experience (for summary statistics of sleep architecture and SO and spindle  
317 events of subjects that entered the correlational analyses see **Supplementary file –**  
318 **table 6**). Notably, we found no differences in electrophysiological parameters (i.e.  
319 coupling strength, event detection) between the adolescents of the wake first and sleep  
320 first group (**Figure 3 – figure supplement 2B & Supplementary file – table 7**). To  
321 investigate whether coupling strength in the night of the first retention interval explains  
322 overnight changes of task proficiency (post retention interval 1 – pre retention interval  
323 1), we computed cluster-corrected correlation analyses. We identified a significant  
324 central cluster (**Figure 3D**; mean  $\rho = 0.37$ ,  $p = 0.017$ ), indicating that participants  
325 with a more consistent SO-spindle interplay have stronger overnight improvements in  
326 task proficiency.

327         Given that we observed a strong negative correlation between task proficiency  
328 at a given time point and the steepness of the subsequent learning curve (cf. **Figure**  
329 **2F**) as subjects improve but do not reach ceiling level performance, we conversely

330 expected a negative correlation between learning curve and coupling. Given this  
331 dependency, we observed a significant cluster-corrected correlation at C4 (**Figure 3E**;  
332  $\rho_s = -0.45$ ,  $p = 0.039$ , cluster-corrected), showing that participants with a more  
333 precise SO-spindle coupling exhibit a flatter learning curve overnight. This observation  
334 is in line with a trade-off between proficiency and learning curve, which exhibits an  
335 upper boundary (100% task proficiency). In other words, individuals with high  
336 performance exhibit a smaller gain through additional training when approaching full  
337 task proficiency.

338 Critically, when computing the correlational analyses separately for adolescents  
339 and adults, we identified highly similar effects at electrode C4 for task proficiency  
340 (**Figure 3 – figure supplement 2C**) and learning curve (**Figure 3 – figure supplement**  
341 **2D**) in each group. These complementary results demonstrate that coupling strength  
342 predicts gross-motor learning dynamics in both, adolescents as well as adults, and  
343 further shows that this effect is not solely driven by one group. Furthermore, our results  
344 remained consistent when including coupled spindle events in NREM2 (**Figure 3 –**  
345 **figure supplement 2E**) and after outlier removal (**Figure 3 – figure supplement**  
346 **2FG**).

347 To rule out age as a confounding factor that could drive the relationship between  
348 coupling strength, learning curve and task proficiency in the mixed sample, we used  
349 cluster-corrected partial correlations to confirm their independence of age differences  
350 (task proficiency: mean  $\rho = 0.40$ ,  $p = 0.017$ ; learning curve:  $\rho_s = -0.47$ ,  $p = 0.049$ ).  
351 Additionally, given that we found that juggling performance could underlie a circadian  
352 modulation we controlled for individual differences in alertness between subjects due  
353 to having just slept. We partialled out the mean PVT reaction time before the juggling  
354 performance test after sleep from the original analyses and found that our results  
355 remained unchanged (task proficiency: mean  $\rho = 0.37$ ,  $p = 0.025$ ; learning curve:



356  $\rho_{os} = -0.49, p = 0.040$ ). For a summary of the reported cluster-corrected partial  
357 correlations as well as analyses controlling for differences in sleep architecture see  
358 **Figure 3 – figure supplement 3**. Further, we also confirmed that our correlations are  
359 not influenced by individual differences in SO and spindle event parameters (**Figure 3**  
360 **– figure supplement 4**).

361 Finally, we investigated whether subjects with high coupling strength have a  
362 gross-motor learning advantage (i.e. trait-effect) or a learning induced enhancement of  
363 coupling strength is indicative for improved overnight memory change (i.e. state-  
364 effect). First, we correlated SO-spindle coupling strength obtained from the adaptation  
365 night with the coupling strength in the learning night. We found that overall, coupling  
366 strength is highly correlated between the two measurements (mean  $\rho$  across all  
367 channels = 0.55, **Figure 3 – figure supplement 2H**), supporting the notion that  
368 coupling strength remains rather stable within the individual (i.e. trait). Second, we  
369 calculated the difference in coupling strength between the learning night and the  
370 adaptation night to investigate a possible state-effect. We found no significant cluster-  
371 corrected correlations between coupling strength change and task proficiency- as well  
372 as learning curve change (**Figure 3 – figure supplement 2I**).

373 Collectively, these results indicate the regionally specific SO-spindle coupling  
374 over central EEG sensors encompassing sensorimotor areas precisely indexes  
375 learning of a challenging motor task.

376

377

378

379

380

381 **Figure 3**

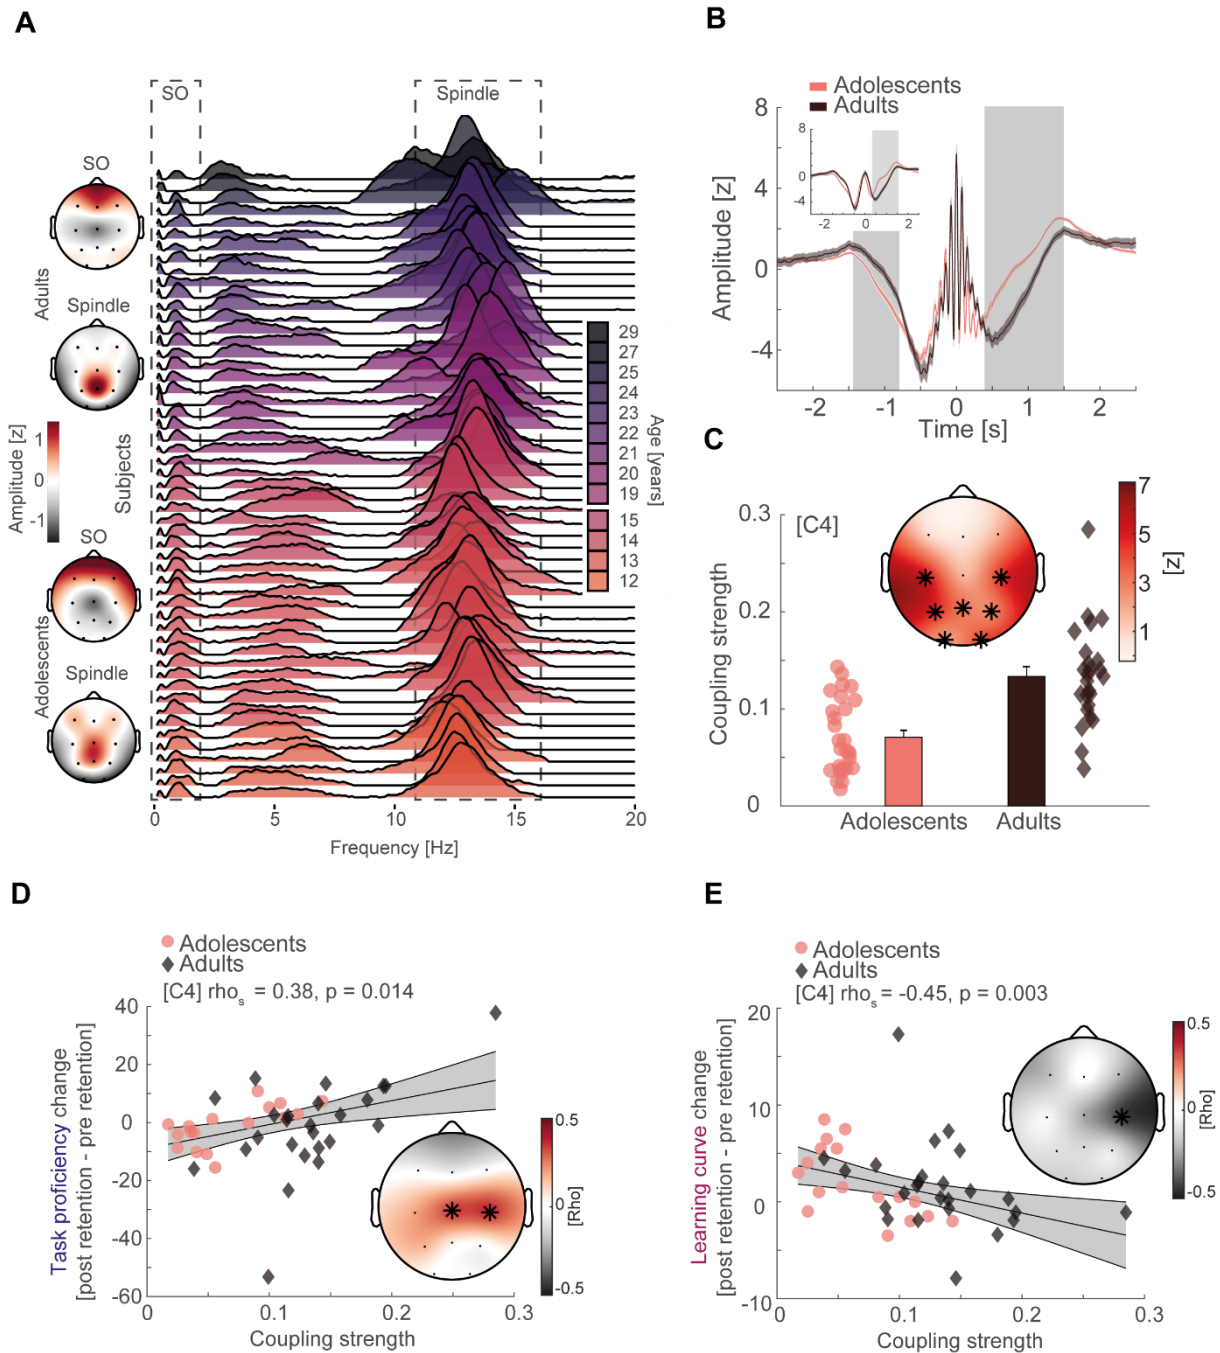

382

383 **Inter-individual variability, SO-spindle coupling development, and neural**  
 384 **correlates of gross-motor learning dynamics**

385 (A) Left: topographical distribution of the 1/f corrected SO and spindle amplitude as extracted  
 386 from the oscillatory residual (Figure 3 – figure supplement 1A, right). Note that adolescents  
 387 and adults both display the expected topographical distribution of more pronounced frontal SO  
 388 and centro-parietal spindles. Right: single subject data of the oscillatory residual for all subjects  
 389 with sleep data color coded by age (darker colors indicate older subjects). SO and spindle  
 390 frequency ranges are indicated by the dashed boxes. Importantly, subjects displayed high  
 391 inter-individual variability in the sleep spindle range and a gradual spindle frequency increase  
 392 by age that is critically underestimated by the group average of the oscillatory residuals (Figure

393 3 – figure supplement 1A, right). **(B)** Spindle peak locked epoch (NREM3, co-occurrence  
394 corrected) grand averages (mean  $\pm$  SEM) for adolescents (red) and adults (black). Inset  
395 depicts the corresponding SO-filtered (2 Hz lowpass) signal. Grey-shaded areas indicate  
396 significant clusters. Note, we found no difference in amplitude after normalization. Significant  
397 differences are due to more precise SO-spindle coupling in adults. **(C)** Top: comparison of SO-  
398 spindle coupling strength between adolescents and adults. Adults displayed more precise  
399 coupling than adolescents in a centro-parietal cluster. T-scores are transformed to z-scores.  
400 Asterisks denote cluster-corrected two-sided  $p < 0.05$ . Bottom: Exemplary depiction of coupling  
401 strength (mean  $\pm$  SEM) for adolescents (red) and adults (black) with single subject data points.  
402 Exemplary single electrode data (bottom) is shown for C4 instead of Cz to visualize the  
403 difference. **(D)** Cluster-corrected correlations between individual coupling strength and  
404 overnight task proficiency change (post – pre retention) for adolescents (red, circle) and adults  
405 (black, diamond) of the sleep-first group (left, data at C4). Asterisks indicate cluster-corrected  
406 two-sided  $p < 0.05$ . Grey-shaded area indicates 95% confidence intervals of the trend line.  
407 Participants with a more precise SO-spindle coordination show improved task proficiency after  
408 sleep. Note that the change in task proficiency was inversely related to the change in learning  
409 curve (cf. Figure 2D), indicating that a stronger improvement in task proficiency related to a  
410 flattening of the learning curve. Further note that the significant cluster formed over electrodes  
411 close to motor areas. **(E)** Cluster-corrected correlations between individual coupling strength  
412 and overnight learning curve change. Same conventions as in (D). Participants with more  
413 precise SO-spindle coupling over C4 showed attenuated learning curves after sleep.

414

415

416

417

418

419

420

421

422

423

424

425

426

## 427 **DISCUSSION**

428 By comparing adolescents and adults learning a complex juggling task, we  
429 critically advance our previous work about the intricate interplay of learning and  
430 memory formation, brain maturation and coupled sleep oscillations: First, we  
431 demonstrated that SO-spindle interplay precision is not only enhanced from childhood  
432 to late adolescence but also progressively improves from early adolescence to young  
433 adulthood (**Figure 3F**). Second and more importantly, we provide first evidence that  
434 the consistency of SO-spindle coordination is a promising model to track real-life gross-  
435 motor skill learning in addition to its key role in declarative learning (**Figure 3DE**).  
436 Notably, this relationship between coupling and learning occurred in a regional specific  
437 manner and was pronounced over frontal areas for declarative and over motor regions  
438 for procedural learning (Hahn et al., 2020). Collectively, our results suggest that precise  
439 SO-spindle coupling supports gross-motor memory formation by integrating  
440 information from subcortical memory structures to cortical networks.

441 How do SO-spindle interactions subserve motor memory formation? Motor  
442 learning is a process relying on complex spatial and temporal scales in the human  
443 brain. To acquire motor skills the brain integrates information from extracortical  
444 structures with cortical structures via cortico-striato-thalamo-cortico loops and cortico-  
445 cerebello-thalamo-cortico circuits (Dayan & Cohen, 2011; Doyon & Benali, 2005;  
446 Doyon et al., 2018; Pinsard et al., 2019). However, growing evidence also advocates  
447 for hippocampal recruitment for motor learning, especially in the context of sleep-  
448 dependent memory consolidation (Albouy et al., 2013; Boyke et al., 2008; Draganski  
449 et al., 2004; Pinsard et al., 2019; Sawangjit et al., 2018; Schapiro et al., 2019).  
450 Hippocampal memory reactivation during sleep is one cornerstone of the active  
451 systems consolidation theory, where coordinated SO-spindle activity route subcortical

452 information to the cortex for long-term storage (Diekelmann & Born, 2010; Helfrich et  
453 al., 2019; Klinzing et al., 2019; Ngo et al., 2020). Quantitative markers of spindle and  
454 SO activity but not the quality of their interaction have been frequently related to motor  
455 memory in the past (Barakat et al., 2011; Bothe et al., 2019; Bothe et al., 2020; Huber  
456 et al., 2004; Morita et al., 2012; Nishida & Walker, 2007; Tamaki et al., 2008). Our  
457 results now complement the active systems consolidation theories' mechanistic  
458 assumption of interacting oscillations by demonstrating that a precise SO-spindle  
459 interplay subserves gross-motor skill learning (**Figure 3DE**). Of note, we did not derive  
460 direct hippocampal activity in the present study given spatial resolution of scalp EEG-  
461 recordings. Nonetheless, as demonstrated recently, coupled spindles precisely  
462 capture cortico-hippocampal network communication as well as hippocampal ripple  
463 expression (Helfrich et al., 2019). Thus, higher SO-spindle coupling strength  
464 supporting gross-motor learning in our study points towards a more efficient  
465 information exchange between hippocampus and cortical areas.

466 Remarkably, hippocampal engagement is especially crucial at the earlier  
467 learning stages. Recently, it has been found that untrained motor sequences exhibit  
468 hippocampal activation that subsides for more consolidated sequences. This change  
469 was further accompanied by increased motor cortex activation, suggesting a  
470 transformative function of sleep for motor memory (Pinsard et al., 2019). In other  
471 words, hippocampal disengagement likely indexes the transition from the fast learning  
472 stage to the slower learning stage with more proficient motor skill (Dayan & Cohen,  
473 2011; Doyon & Benali, 2005). The dynamics of the two interacting learning stages of  
474 motor skill acquisition are likely reflected by the inverse relationship between task  
475 proficiency increases and learning curve attenuation (**Figure 2F**). Given that our  
476 subjects did not reach asymptotic performance level (**Figure 2AB**) and that SO-spindle  
477 coupling tracks gross-motor skill learning dynamics as it relates to both, learning curve

478 attenuation and task proficiency increments, it is plausible that SO-coupling strength  
479 represents the extent of hippocampal support for integrating information to motor  
480 cortices during complex motor skill learning.

481 Interestingly, SO and spindles are not only implicated in hippocampal-  
482 neocortical network communication but are also indicative for activity and information  
483 exchange in subcortical areas that are more traditionally related to the shift from fast  
484 to slow motor learning stages. For example, striatal network reactivation during sleep  
485 was found to be synchronized to sleep spindles, which predicted motor memory  
486 consolidation (Fogel et al., 2017). In primates, coherence between M1 and cerebellum  
487 in the SO and spindle frequency range suggested that coupled oscillatory activity  
488 conveys information through cortico-thalamo-cerebellar networks (Xu et al., 2020).  
489 One testable hypothesis for future research is whether SO-spindle coupling represents  
490 a more general gateway for the brain to exchange subcortical and cortical information  
491 and not just hippocampal-neocortical communication.

492 Critically, we found that the consistency of the SO-spindle interplay identified at  
493 electrodes overlapping with motor areas such as M1 was predictive for the gross-motor  
494 learning process (**Figure 3DE**). This finding corroborates the idea that SO-spindle  
495 coupling supports the information flow between task-relevant subcortical and cortical  
496 areas. Recent evidence in the rodent model demonstrated that neural firing patterns in  
497 M1 during spindles became more coherent after performing a grasping motor task. The  
498 extent of neural firing precision was further mediated by a function of temporal  
499 proximity of spindles to SOs (Silversmith et al., 2020). Through this synchronizing  
500 process and their Ca<sup>2+</sup> influx propagating property, coupled spindles are likely to  
501 induce neural plasticity that benefits motor learning (Niethard et al., 2018).

502 How relevant is sleep for real-life gross-motor memory consolidation? We found  
503 that sleep impacts the learning curve but did not affect task proficiency in comparison

504 to a wake retention interval (**Figure 2DE**). Two accounts might explain the absence of  
505 a sleep effect on task proficiency. (1) Sleep rather stabilizes than improves gross-motor  
506 memory, which is in line with previous gross-motor adaption studies (Bothe et al., 2019;  
507 Bothe et al., 2020). (2) Pre-sleep performance is critical for sleep to improve motor  
508 skills (Wilhelm et al., 2012). Participants commonly reach asymptotic pre-sleep  
509 performance levels in finger tapping tasks, which is most frequently used to probe  
510 sleep effects on motor memory. Here we found that using a complex juggling task,  
511 participants do not reach asymptotic ceiling performance levels in such a short time.  
512 Indeed, the learning progression for the *sleep-first* and *wake-first* groups followed a  
513 similar trend (**Figure 2AB**), suggesting that more training and not in particular sleep  
514 drove performance gains. We note that juggling performance in our study could have  
515 been influenced by the timing of when learning is optimal in the circadian cycle.  
516 However, we did not find evidence for a circadian modulation of cognitive engagement  
517 based on objective reaction time data (**Figure 2 – figure supplement 1C**).  
518 Nonetheless, we cannot fully disentangle circadian and sleep effects with our study  
519 design, which should be considered a limitation to our findings. Importantly, SO-spindle  
520 coupling still predicted learning dynamics on a single subject level advocating for a  
521 supportive function of sleep for gross-motor memory. Moreover, we found that SO-  
522 spindle coupling strength remains remarkably stable between two nights, which also  
523 explains why a learning-induced change in coupling strength did not relate to behavior  
524 (**Figure 3 – figure supplement 2I**). Thus, our results primarily suggest that strength  
525 of SO-spindle coupling correlates with the ability to learn (trait), but does not solely  
526 convey the recently learned information. This set of findings is in line with recent ideas  
527 that strong coupling indexes individuals with highly efficient subcortical-cortical network  
528 communication (Helfrich et al., 2021).

529           This subcortical-cortical network communication is likely to be refined  
530 throughout brain development, since we discovered elevated coupling strength in  
531 adults compared to early adolescents (**Figure 3C**). This result compliments our earlier  
532 findings of enhanced coupling precision from childhood to adolescence (Hahn et al.,  
533 2020) and the recently demonstrated lower coupling strength in pre-school children  
534 (Joechner et al., 2021). We speculate that, similar to other spindle features, the  
535 trajectory of SO-coupling strength is likely to reach a plateau during adulthood (Nicolas  
536 et al., 2001; Purcell et al., 2017). Importantly, we identified similar methodological  
537 challenges to assess valid cross-frequency coupling estimates in the current cross-  
538 sectional study to the previous longitudinal study. Age severely influences fractal  
539 dynamics in the brain (**Figure 3 – figure supplement 1A**) and the defining features of  
540 sleep oscillations (**Figure 3B & Figure 3 – figure supplement 1B**). Remarkably, inter-  
541 individual oscillatory variability was pronounced even in the adult age group (**Figure**  
542 **3A**), highlighting the critical need to employ individualized cross-frequency coupling  
543 analyses to avoid its pitfalls (Aru et al., 2015; Muehlroth & Werkle-Bergner, 2020).

544           Taken together, our results provide a mechanistic understanding of how the  
545 brain forms real-life gross-motor memory during sleep. As sleep has been shown to  
546 support fine-motor memory consolidation in individuals after stroke (Gudberg &  
547 Johansen-Berg, 2015; Siengsuhon & Boyd, 2008), SO-spindle coupling integrity could  
548 be a valuable, easy to assess predictive index for rehabilitation success.



549 **ACKNOWLEDGMENTS**

550 This research was supported by Austrian Science Fund (P25000-B24) and the Centre  
551 for Cognitive Neuroscience Salzburg (CCNS). M.A.H. was additionally supported by  
552 the Doctoral Collage 'Imaging the Mind' (FWF, Austrian Science Fund W1233-G17).  
553 R.F.H. is supported by the German Research Foundation (DFG, HE 8329/2-1), the  
554 Hertie Foundation (Hertie Network of Excellence in Clinical Neurosciences) and the  
555 Jung Foundation for Science and Research (Ernst Jung Career Advancement Award).

556

557 **AUTHOR CONTRIBUTIONS**

558 Conceptualization, M.A.H., R.F.H., K.H.; Methodology, R.F.H., K.H., M.S.; Software,  
559 R.F.H., M.A.H.; Validation, M.A.H., R.F.H., K.H.; Formal Analysis, M.A.H.;  
560 Investigation, M.A.H., K.B., K.H.; Resources, K.H., M.S.; Data Curation, M.A.H., K.H.,  
561 K.B., D.P.J.H.; Writing – Original Draft, M.A.H.; Writing – Review & Editing, R.F.H.,  
562 K.H., M.S., D.P.J.H., K.B.; Visualization, M.A.H., D.P.J.H.; Supervision, R.F.H, K.H.;  
563 Project Administration, K.H.; Funding Acquisition, K.H.

564

565 **DECLARATION OF INTEREST**

566

The authors declare no competing interests.

567

568

569

570

571

572

## 573 MATERIAL AND METHODS

| Key Resources Table                |                                  |                                                                                                                                        |                 |                             |
|------------------------------------|----------------------------------|----------------------------------------------------------------------------------------------------------------------------------------|-----------------|-----------------------------|
| Reagent type (species) or resource | Designation                      | Source or reference                                                                                                                    | Identifiers     | Additional information      |
| software, algorithm                | Brain Vision Analyzer 2.2        | Brain Products GmbH<br><a href="https://www.brainproducts.com">https://www.brainproducts.com</a>                                       | RRID:SCR_002356 |                             |
| software, algorithm                | CircStat 2012                    | Berens (2009)<br><a href="https://philippberens.wordpress.com/code/circstats/">https://philippberens.wordpress.com/code/circstats/</a> | RRID:SCR_016651 |                             |
| software, algorithm                | EEGLAB 13_4_4b                   | Delorme and Makeig (2004)<br><a href="https://scn.ucsd.edu/eeglab/index.php">https://scn.ucsd.edu/eeglab/index.php</a>                 | RRID:SCR_007292 |                             |
| software, algorithm                | FieldTrip 20161016               | Oostenveld et al. (2011)<br><a href="http://www.fieldtriptoolbox.org/">http://www.fieldtriptoolbox.org/</a>                            | RRID:SCR_004849 |                             |
| software, algorithm                | IRASA                            | Wen and Liu (2016)<br><a href="https://purr.purdue.edu/publications/1987/1">https://purr.purdue.edu/publications/1987/1</a>            |                 |                             |
| software, algorithm                | MATLAB 2017a                     | MathWorks Inc.                                                                                                                         | RRID:SCR_001622 |                             |
| software, algorithm                | RStudio                          | RStudio Team                                                                                                                           | RRID:SCR_000432 |                             |
| software, algorithm                | Somnolyzer 24 x 7                | Koninklijke Philips N.V.<br><a href="https://www.philips.co.in">https://www.philips.co.in</a>                                          |                 |                             |
| other                              | “Jonglieren und Bewegungskünste” | Sobota & Hollauf (2013)<br>Austrian ministry of Sports                                                                                 |                 | Juggling video instructions |

## 574 Participants

575 We recruited 29 adolescents (mean  $\pm$  SD age, 13.17  $\pm$  0.85 years; 5 female, 24  
576 male) from a local boarding school and 41 young adults (mean  $\pm$  SD age, 22.24  $\pm$  2.15  
577 years; 16 female, 25 male) from the student population of the University of Salzburg.  
578 All participants were healthy, right-handed and without prior juggling experience.  
579 However, we excluded one adolescent for all analyses post-hoc for violating the prior

580 juggling experience criteria. Two adolescents did not participate in the third  
581 performance test. We randomly divided adolescents and adults into a *sleep-first*  
582 (adolescents: N = 17, 12.94 ± 0.75 years; 3 females, 14 males; adults: N = 25, 21.95  
583 ± 2.42 years; 8 females, 17 males) and a *wake-first* group (adolescents: N = 11, 13.36  
584 ± 0.81 years; 2 females, 9 males; adults: N = 16, 22.69 ± 1.62 years; 8 females, 8  
585 males). See experimental design for more detailed information about the groups. We  
586 recorded polysomnography (PSG) during full night sleep for all participants except  
587 adults in the *wake-first* group. Therefore, comparison of electrophysiological data  
588 between adults and adolescents was based on the adult *sleep-first* group and both  
589 adolescent groups. To ensure similar juggling learning experience, we only included  
590 adults and adolescents in the *sleep-first* group when analyzing the relationship  
591 between electrophysiological measures and behavioral performance. All participants  
592 and the legal custodians of the adolescents provided written informed consent before  
593 participating in the study. The study protocol was conducted in accordance with the  
594 Declaration of Helsinki and approved by the ethics committee of the University of  
595 Salzburg (EK-GZ:16/2014). Adults received monetary compensation or student credit  
596 for their participation. Adolescents received a set of juggling balls.

597

## 598 **Experimental design**

599 Adults in the *sleep-first* group visited the sleep laboratory on three occasions  
600 (**Figure 1**). At the first day subjects slept in the sleep lab with full night PSG for  
601 adaptation purposes. On the second visit, subjects learned and practiced juggling by  
602 video instructions in the evening (8.45 pm - 9.45 pm). Juggling performance was  
603 assessed three times in total. The first performance test was conducted after the  
604 training session (10.00 pm – 10.18pm). The second performance test (7.30 am – 7.48  
605 am) took place after the first retention interval containing a full night of sleep with

606 polysomnography (11 pm – 7 am). The third and last performance test was executed  
607 after the second retention interval (9.00 pm – 9.18 pm) containing wakefulness. Adults  
608 in the *wake-first* group followed a similar protocol but with reversed order of the  
609 retention intervals (i.e. first retention interval containing wakefulness and the second  
610 interval containing sleep). Therefore, participants performed the juggling training  
611 (10.15 am – 11.15 am) and the first performance test (11.30 am – 11.48 am) in the  
612 morning, the second performance test after wakefulness (9.00 pm – 9.18 pm) and the  
613 third performance test after sleep (11.00 am – 11.18 am). We did not record  
614 polysomnography in the *wake-first* group because participants slept at home. To  
615 objectively assess attentiveness and potential circadian influences, all participants  
616 completed a psychomotor vigilance task (Dinges & Powell, 1985) before the  
617 performance tests. Actigraphy (Cambridge Neurotechnology Actiwatch, Cambridge,  
618 UK) and a sleep log (Saletu et al., 1987) verified compliance with a regular sleep  
619 schedule throughout the study.

620         Adolescents went through a study protocol comparable to the adults. However,  
621 we adjusted the protocol to adhere to the schedule of the boarding school and to  
622 control the training load. First, we recorded ambulatory PSG for both groups in their  
623 habitual sleep environment at the boarding school and second, we reduced the number  
624 of juggling blocks during the performance tests (for details see gross-motor task)  
625 because the study regime was already exhausting for our adult participants and we  
626 wanted to avoid a too excessive training load. The *sleep-first* group performed the  
627 juggling training (6.30 pm – 7.30 pm) and performance test in the evening (7.45 pm –  
628 7.58 pm) followed by a retention interval containing sleep (21.00 pm – 6.00 am). The  
629 second performance test was conducted after sleep (7.30 am – 7.43 am) and the third  
630 performance test after wakefulness (7.30 pm – 7.43 pm). The *wake-first* group learned  
631 to juggle (7.30 am – 8.30 am) with a subsequent performance test (8.45 am – 8.58 am)

632 in the morning. The second performance test was executed after wakefulness in the  
633 evening (7.30 pm – 7.43 pm) and the third performance test was completed after sleep  
634 (7.30 am – 7.43 am).

635

### 636 **Gross-motor task**

637 To investigate the involvement of slow oscillation-spindle coupling in acquiring  
638 a real-life gross motor skill, we implemented a juggling paradigm, which has been  
639 shown to induce neural plasticity (Boyke et al., 2008; Draganski et al., 2004) and to be  
640 sensitive for sleep-dependent memory consolidation (Morita et al., 2012, 2016). Adults  
641 and adolescents completed the same juggling training, which was based on short video  
642 clips from the “Juggling and Movement Arts” DVD (“Jonglieren und  
643 Bewegungskünste”; Sobota & Hollauf, 2013) containing step-by-step instructions from  
644 the correct stance to a full five-ball cascade (i.e. five continuous catches). We used 14  
645 video clips demonstrating the exercises followed by a practice opportunity for the  
646 participants. The training session lasted approximately one hour with a short break  
647 after half an hour. During the performance tests, participants were instructed to juggle  
648 as accurately and continuously as possible. Adults juggled for five blocks á three  
649 minutes, which was always separated by a 30 second break. To alleviate the physical  
650 strain, adolescents only juggled for three blocks á three minutes during the  
651 performance tests. Training and performance tests were videotaped to evaluate the  
652 juggling performance.

653

### 654 **Parameterizing juggling performance**

655 We evaluated the juggling performance by counting consecutive catches based  
656 on the video material. We used the number of three ball cascades (i.e. three catches  
657 in a row, **Figure 2AB**) as index for juggling performance by dividing the number of

658 consecutive catches by three. We opted for three ball cascades as a performance  
659 index because we considered three consecutive catches as the criteria for the motor  
660 task to qualify as juggling (Boyke et al., 2008; Draganski et al., 2004). Because juggling  
661 is a complex motor task where it is unlikely to reach ceiling level performance, we were  
662 interested in the progression of the learning process and how it is influenced by task  
663 proficiency. Therefore, we calculated a first degree polynomial fit using the least-  
664 squares method to parameterize the learning curve (m, slope) per performance test  
665 block (**Figure 2AB**, black lines & **Figure 2CD**), using the formula:

$$666 \quad m = \frac{\sum_{i=1}^n (x_i - \bar{X}) * (y_i - \bar{Y})}{\sum_{i=1}^n (x_i - \bar{X})^2}$$

667 Next, we calculated the intercept c according to the following formula:

$$668 \quad c = \bar{Y} - m * \bar{X}$$

669 Finally, task proficiency ( $y_1$ , **Figure 2E**) was estimated at the first time point of each  
670 performance test as

$$671 \quad y_1 = m + c$$

672

### 673 **Polysomnography and sleep staging**

674 We recorded PSG with two systems. We conducted the ambulatory sleep  
675 recordings of the adolescents with a portable amplifier system (Alphatrace, Becker  
676 Meditec, Karlsruhe, Germany) with a sampling rate of 512 Hz. For in lab recordings of  
677 the adult participants, we utilized a 32-channel Neuroscan amplifier system (Scan 4.3.3  
678 Software, Neuroscan Inc., Charlotte, NC) with a sampling rate of 500 Hz. Electrode  
679 placement was identical between the two recording systems and in accordance with  
680 the 10-20 system. Signals were recorded with gold cup electrodes placed at F3, Fz,  
681 F4, C3, Cz, C4, P3, Pz, P4, O1 and O2 on the scalp, as well as at A1 and A2 placed  
682 at the mastoids. To allow for sleep staging and to control for muscle artifacts, we

683 recorded an electromyogram (EMG, bipolar electrodes at the musculus mentalis), a  
684 horizontal electrooculogram (EOG, above the right outer canthus and below the left  
685 outer canthus) and a vertical EOG (above and below the left eye). We used Cz as  
686 online reference and AFz as ground electrode. For sleep staging, we re-referenced the  
687 signal offline against contralateral mastoids. Sleep was semi-automatically staged in  
688 30 s epochs using the Somnolyzer 24x7 algorithm (Koninklijke Philips N.V.; Eindhoven,  
689 The Netherlands) and subsequently controlled by an expert scorer according to  
690 standard sleep staging criteria (Iber et al., 2007). For all other data analyses, we  
691 demeaned and re-referenced the EEG signal to a common average.

692

### 693 **Individualized cross-frequency coupling**

694 To assess the precise interplay between SO and spindles, we used the same  
695 individualized cross-frequency coupling pipeline we developed earlier in order to  
696 account for network changes induced by aging, that are known to cause spurious  
697 coupling estimates (Aru et al., 2015; Cole & Voytek, 2017; Hahn et al., 2020; Scheffer-  
698 Teixeira & Tort, 2016). In brief, our approach was based on the following principles: (1)  
699 establishing the presence of sleep oscillations, (2) individually detecting transient  
700 oscillatory events, (3) alleviating power differences and (4) ensuring co-occurrence of  
701 SO (phase providing signal) and sleep spindles (amplitude providing signal).

702

#### 703 *Establishing sleep oscillations*

704 First, we z-normalized the EEG-signal in the time domain to mitigate prominent  
705 power differences and computed averaged power spectra from 0.1 to 30 Hz using a  
706 Fast Fourier Transform (FFT) routine with a Hanning window on 15 s of continuous  
707 NREM sleep (i.e. NREM2 and NREM3, **Figure 3 – figure supplement 1A, left**) with  
708 a 1 s sliding window. Data are presented in the semi-log space. Next, we sought to

709 isolate the oscillatory activity in the normalized data by means of irregular auto-spectral  
710 analysis (IRASA, (Wen & Liu, 2016)). We first derived the 1/f fractal component (**Figure**  
711 **3 – figure supplement 1A middle**) from 15 s NREM sleep data in 1 s sliding steps  
712 and subsequently subtracted it from the power spectrum (**Figure 3 – figure**  
713 **supplement 1A left**) to obtain an unbiased estimate of the oscillatory activity for every  
714 subject on every electrode (**Figure 3 – figure supplement 1A right & Figure 3A**). To  
715 separate the 1/f component from the power spectrum, we used the same parameters  
716 as specified previously (Hahn et al., 2020). In short, the signal is stretched and  
717 compressed by the same non-integer factor (e.g. stretching by a factor of 1.1 and  
718 compressing by a factor of 0.9). We repeated the resampling with factors from 1.1 to  
719 1.9 in 0.05 steps. This pair wise stretching and compressing systematically causes  
720 frequency peak shifts in the regular oscillatory activity but leaves the more random 1/f  
721 background activity unaffected. Because the oscillatory activity becomes faster by a  
722 similar factor as it becomes slower, the oscillatory activity is averaged out by median  
723 averaging across all pair wise resampled segments thus extracting the 1/f component.  
724 We then detected individual SO (< 2 Hz) and spindle peak frequencies (10 – 17 Hz,  
725 **Figure 3 – figure supplement 1B**) and the corresponding 1/f corrected amplitude  
726 (**Figure 3A left**) in the oscillatory residual (**Figure 3 – figure supplement 1A right**).  
727 We considered the highest peak within the specified SO and spindle frequency ranges  
728 above as the most representative oscillatory event in each electrode. We then utilized  
729 the individual frequency peaks to inform the algorithms for discrete SO and spindle  
730 event detection.

731

### 732 *Individually detecting transient oscillatory events*

733 We employed widely used spindle and SO detection algorithms (Helfrich et al.,  
734 2018; Molle et al., 2011; Staresina et al., 2015) and adjusted them according to the 1/f



735 corrected SO and spindle features for a fully individualized event detection (Hahn et  
736 al., 2020).

737 We detected spindle events (**Figure 3B & Figure 3 – figure supplement 1E**)  
738 by band-pass filtering the continuous signal  $\pm 2$  Hz around the individual spindle peak  
739 per electrode. After filtering, we computed the instantaneous amplitude via a Hilbert  
740 transform. Next, we smoothed the signal with a running average in a 200 ms window.  
741 A sleep spindle was detected, when the signal exceeded the 75-percentile amplitude  
742 criterion for a time span of 0.5 to 3 s. We segmented the raw data  $\pm 2.5$  s centered on  
743 the positive spindle peak.

744 We detected SO events (**Figure 3 – figure supplement 1F**) by first high-pass  
745 filtering the continuous EEG signal at 0.16 Hz and then low-pass filtering at 2 Hz.  
746 Based on the filtered signal, we detected the zero-crossings that fulfilled the time  
747 criterion (length 0.8 – 2 s). The signal between two consecutive zero-crossings was  
748 considered a valid SO if its amplitude exceeded the 75-percentile threshold. We then  
749 segmented the raw data  $\pm 2.5$  s centered on the negative peak.

750

### 751 *Alleviating power differences*

752 Power differences in the signal can systematically impact cross-frequency  
753 coupling measures by changing the signal-to-noise ratio, which in turn influences the  
754 precision of the phase estimation of the signal (Aru et al., 2015; Scheffer-Teixeira &  
755 Tort, 2016). Because power decreases are apparent across the lifespan (Campbell &  
756 Feinberg, 2009, 2016; Hahn et al., 2020; Helfrich et al., 2018), we z-normalized all  
757 detected SO and spindle events in the time domain to alleviate this possible confound  
758 before calculating phase-amplitude coupling measures (**Figure 3B**).

759

760

761 *Ensuring co-occurrence of SO and sleep spindles*

762 Cross-frequency coupling renders meaningful information of network  
763 communication only when the suspected interacting oscillations are present in the  
764 signal. Therefore, we only analyzed SO and sleep spindle epochs during which they  
765 co-occurred in a 2.5s time window ( $\pm \sim 2$  SO cycles around the spindle peak).  
766 Furthermore, we restricted all our coupling analyses to sleep stage NREM3 because  
767 of general lower co-occurrence of SO and spindles in NREM2 (Figure 3 – figure  
768 supplement 1CD), which can cause spurious coupling estimates (Hahn et al., 2020).

769

770 *Event-locked cross-frequency coupling*

771 To parameterize the timed coordination between sleep spindles and SO (**Figure**  
772 **3C**), we computed event-locked cross-frequency coupling analyses (Dvorak & Fenton,  
773 2014; Hahn et al., 2020; Helfrich et al., 2019; Helfrich et al., 2018; Staresina et al.,  
774 2015) based on individualized and normalized spindle peak-locked segments. In short,  
775 we used a low-pass filter of 2 Hz to extract the underlying SO-component (**Figure 3D**)  
776 from the EEG-signal and read out the phase angle corresponding with the sleep  
777 spindle peak after applying a Hilbert transform. We then calculated the coupling  
778 strength, which is defined as  $1 - \text{circular variance}$  using the CircStat Toolbox function  
779 `circ_r` (Berens, 2009) to assess the consistency of the SO sleep spindle interplay.

780

781 *Time frequency analyses*

782 We computed event-locked time-frequency representations based on -2 to 2s  
783 epochs centered on the negative SO peak (**Figure 3 – figure supplement 1F**). We  
784 used a 500 ms Hanning window in 50 ms steps to analyze the frequency power from  
785 5 to 30 Hz in steps of 0.5 Hz. We subsequently baseline corrected the time-frequency  
786 representations by z-scoring the data based on the means and standard deviations of

787 a bootstrapped distribution (10000 iterations) for the -2 to -1.5 s time interval of all trials  
788 (Flinker et al., 2015; Helfrich et al., 2018).

789

## 790 **Statistical analyses**

791 To compare juggling performance between the *sleep-first* and *wake-first* group  
792 and to assess the learning progression, we computed mixed ANOVAS with the  
793 between factor condition group (*sleep-first*, *wake-first*) and the repeated measure  
794 factor juggling blocks. Because number of juggling blocks differed between  
795 adolescents (9, **Figure 2A**) and adults (15, **Figure 2B**) we analyzed the juggling  
796 performance separately per age group. Influence of sleep on learning curve (**Figure**  
797 **2D**) and task proficiency (**Figure 2E**) was assessed by a mixed ANOVA with the  
798 between factors condition group (*sleep-first*, *wake-first*) and age group (adolescents,  
799 adults) and the repeated factor performance test (pre retention interval 1, post retention  
800 interval 1). To correct for multiple comparisons we clustered the data in the frequency  
801 (**Figure 3 – figure supplement 1A**), time (**Figure 3B**) and space domain (**Figure 3C**  
802 **& Figure 3 – figure supplement 1B**), using cluster-based random permutation testing  
803 (Monte-Carlo method, cluster alpha 0.05, max size criterion, 1000 iterations, critical  
804 alpha level 0.05 two-sided; Maris & Oostenveld, 2007). Given our sparse sampling of  
805 only 11 scalp electrodes, we set the minimum number of neighborhood electrodes  
806 required to be included in the clustering algorithm to zero. For correlational analyses  
807 we utilized spearman rank correlations ( $\rho_s$ ; **Figure 2F & Figure 3DE**) to mitigate the  
808 impact of possible outliers as well as cluster-corrected spearman rank correlations by  
809 transforming the correlation coefficients to t-values ( $p < 0.05$ ) and clustering in the  
810 space domain (**Figure 3DE**). Linear trend lines were calculated using robust  
811 regression. To control for possible confounding factors we computed cluster-corrected  
812 partial rank correlations (**Figure 3 – figure supplement 3 and 4**). We report partial eta

813 squared ( $\eta^2$ ), Cohen's d (d) and averaged spearman correlation coefficients (mean  
814 rho) as effect sizes. Cluster effect sizes are estimated by first calculating Cohen's d for  
815 every data point in the significant cluster and subsequently averaging across the  
816 obtained values.

817

## 818 **Data analyses**

819 We used functions from the Fieldtrip toolbox (Oostenveld et al., 2011), EEGLab  
820 toolbox (Delorme & Makeig, 2004), CircStat toolbox (Berens, 2009) and custom written  
821 code implemented in MatLab 2015a (Mathworks Inc.) for data analyses. Irregular auto-  
822 spectral analysis (IRASA (Wen & Liu, 2016)) was conducted using code obtained from  
823 the original research paper.

## 824 **DATA AVAILABILITY**

825 The behavioral and electrophysiological preprocessed data and scripts to replicate the  
826 main conclusions and figures of the paper are available at  
827 [https://datadryad.org/stash/share/177ueSz3dyTr3-](https://datadryad.org/stash/share/177ueSz3dyTr3-x6pRaUbZncoOZXNdr_SThSNNkx0A)  
828 [x6pRaUbZncoOZXNdr\\_SThSNNkx0A](https://datadryad.org/stash/share/177ueSz3dyTr3-x6pRaUbZncoOZXNdr_SThSNNkx0A) (doi:10.5061/dryad.qfttdz0gh).

829 **SUPPLEMENTARY FIGURES**

830

831 **Figure 2 – figure supplement 1**

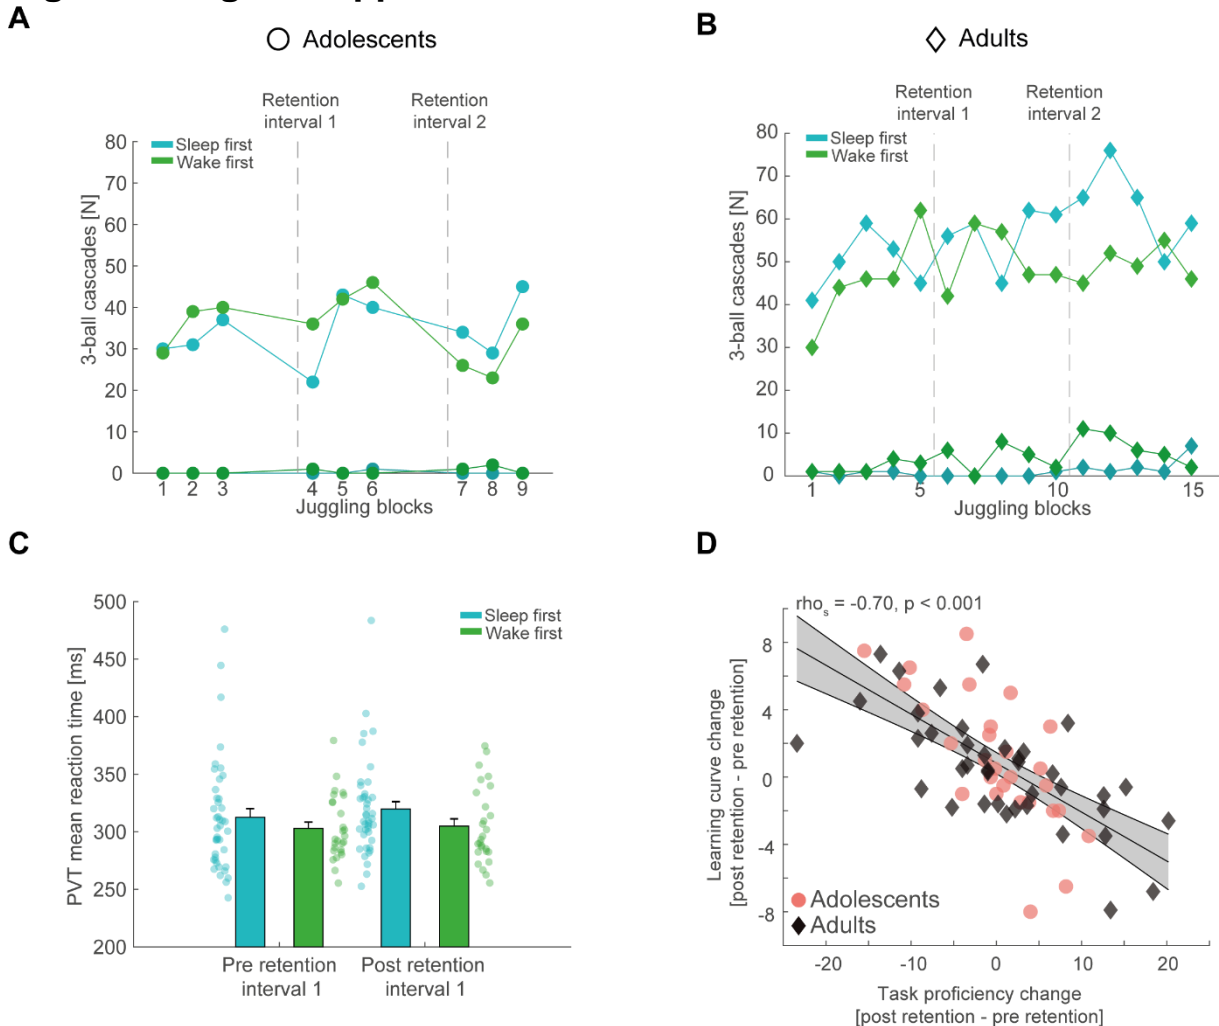

832

833 **(A)** Single subject data of successful three-ball cascades per juggling block for well performing adolescents (upper lines) and worse performing adolescents (lower lines) color coded for their  
 834 adolescents (upper lines) and worse performing adolescents (lower lines) color coded for their  
 835 respective group affiliation. **(B)** Same conventions as in (A) but for adults. **(C)** Reaction time  
 836 (mean  $\pm$  SEM) for the sleep first (blue) and wake first groups (green, collapsed across  
 837 adolescents and adults) in the psychomotor vigilance tasks conducted before the juggling  
 838 performance test pre and post the first retention interval. We found no significant difference  
 839 between the groups ( $F(1,67) = 1.87, p = 0.18, \text{partial } \eta^2 = 0.03$ ) nor between the performance  
 840 tests ( $F(1,67) = 1.06, p = 0.31, \text{partial } \eta^2 = 0.02$ ). Critically, we found no significant interaction  
 841 ( $F(1,67) = 0.35, p = 0.55, \text{partial } \eta^2 = 0.01$ ) indicating that participants' cognitive engagement  
 842 did not differ in the juggling performance tests due to the preceding sleep or wake intervals.  
 843 **(D)** Spearman rank-correlation between the overnight change in task proficiency (post – pre  
 844 retention interval) and the overnight change in learning curve with robust linear trend line  
 845 collapsed over the whole sample after outlier removal. The strong inverse relationship  
 846 between task proficiency and learning curve originally observed in Figure 2F persisted. Grey-  
 847 shaded area indicates 95% confidence intervals of the trend line. Adolescents are denoted as  
 848 red circles and adults as black diamonds.

849

850 **Figure 3 – figure supplement 1**

**A**

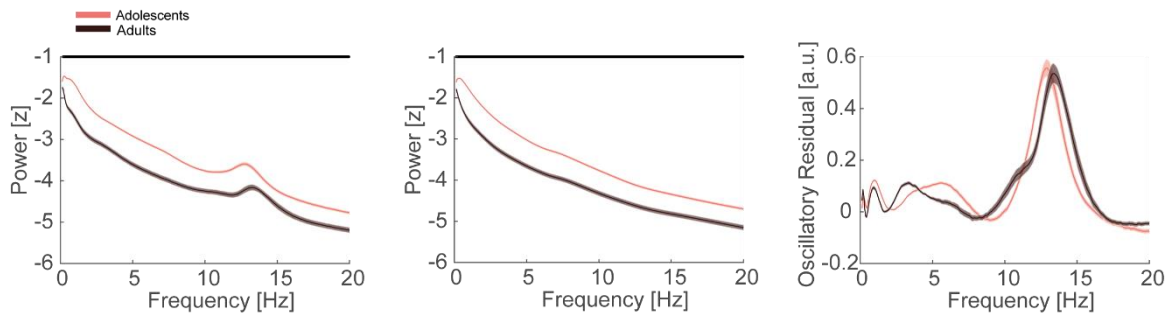

**B**

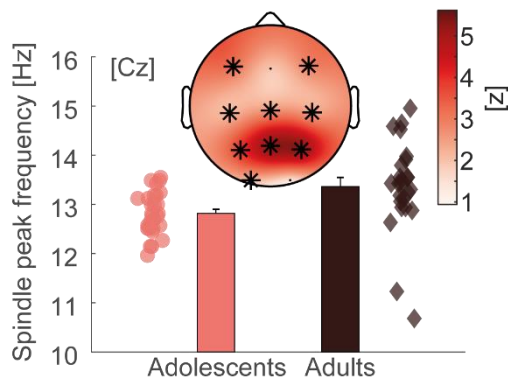

**C**

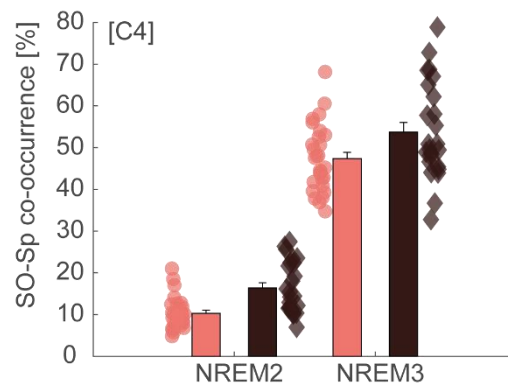

**D**

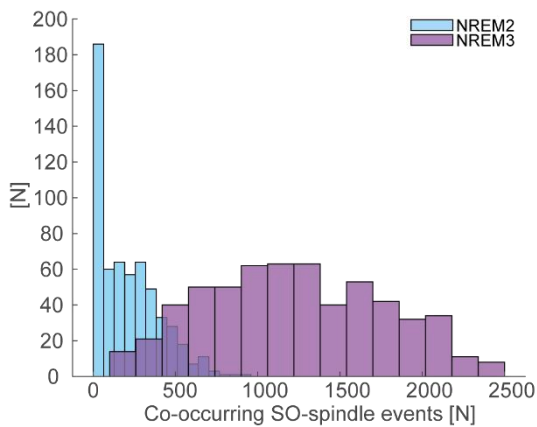

**E**

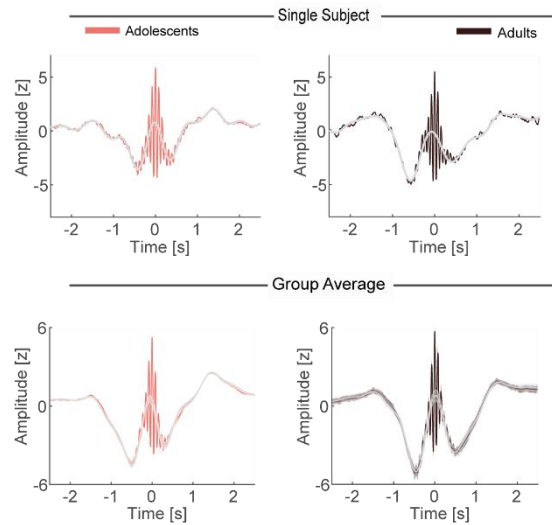

**F**

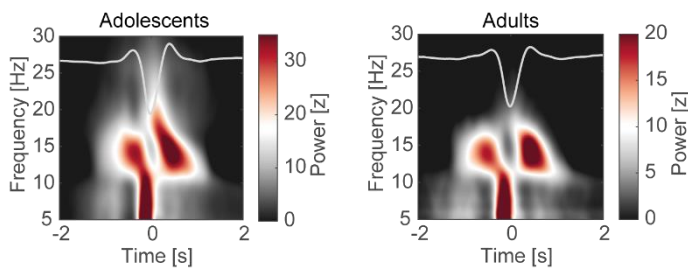

851  
852 **(A)** Left: Z-normalized EEG power spectra (mean  $\pm$  SEM) for adolescents (red) and adults  
853 (black) during NREM sleep in semi-log space. Data is displayed for the representative

854 electrode Cz unless specified otherwise. Note the overall power difference between  
855 adolescents and adults due to a broadband shift on the y-axis. Straight black line denotes  
856 cluster-corrected significant differences. Middle:  $1/f$  fractal component that underlies the  
857 broadband shift. Right: Oscillatory residual after subtracting the fractal component (A, middle)  
858 from the power spectrum (A, left). Both groups show clear delineated peaks in the SO (< 2 Hz)  
859 and spindle range (11 – 16 Hz) establishing the presence of the cardinal sleep oscillations in  
860 the signal. **(B)** Top: Spindle frequency peak development based on the oscillatory residuals.  
861 Spindle frequency is faster at all but occipital electrodes in adults than in adolescents. T-scores  
862 are transformed to z-scores. Asterisks denote cluster-corrected two-sided  $p < 0.05$ . Bottom:  
863 Exemplary depiction of the spindle frequency (mean  $\pm$  SEM) for adolescents (red) and adults  
864 (black) with single subject data points at Cz. **(C)** SO-spindle co-occurrence rate (mean  $\pm$  SEM)  
865 for adolescents (red) and adults (black) during NREM2 and NREM3 sleep. Event co-  
866 occurrence is higher in NREM3 ( $F(1, 51) = 1209.09$ ,  $p < 0.001$ , partial  $\eta^2 = 0.96$ ) as well as  
867 in adults ( $F(1, 51) = 11.35$ ,  $p = 0.001$ , partial  $\eta^2 = 0.18$ ). **(D)** Histogram of co-occurring SO-  
868 spindle events in NREM2 (blue) and NREM3 (purple) collapsed across all subjects and  
869 electrodes. Note the low co-occurring event count in NREM2 sleep. **(E)** Single subject (top)  
870 and group averages (bottom, mean  $\pm$  SEM) for adolescents (red) and adults (black) of  
871 individually detected, for SO co-occurrence-corrected sleep spindles in NREM3. Spindles were  
872 detected based on the information of the oscillatory residual. Note the underlying SO-  
873 component (grey) in the spindle detection for single subject data and group averages indicating  
874 a spindle amplitude modulation depending on SO-phase. **(F)** Grand average time frequency  
875 plots (-2 to -1.5s baseline-corrected) of SO-trough-locked segments (corrected for spindle co-  
876 occurrence) in NREM3 for adolescents (left) and adults (right). Schematic SO is plotted  
877 superimposed in grey. Note the alternating power pattern in the spindle frequency range,  
878 showing that SO-phase modulates spindle activity in both age groups.  
879

880 **Figure 3 – figure supplement 2**

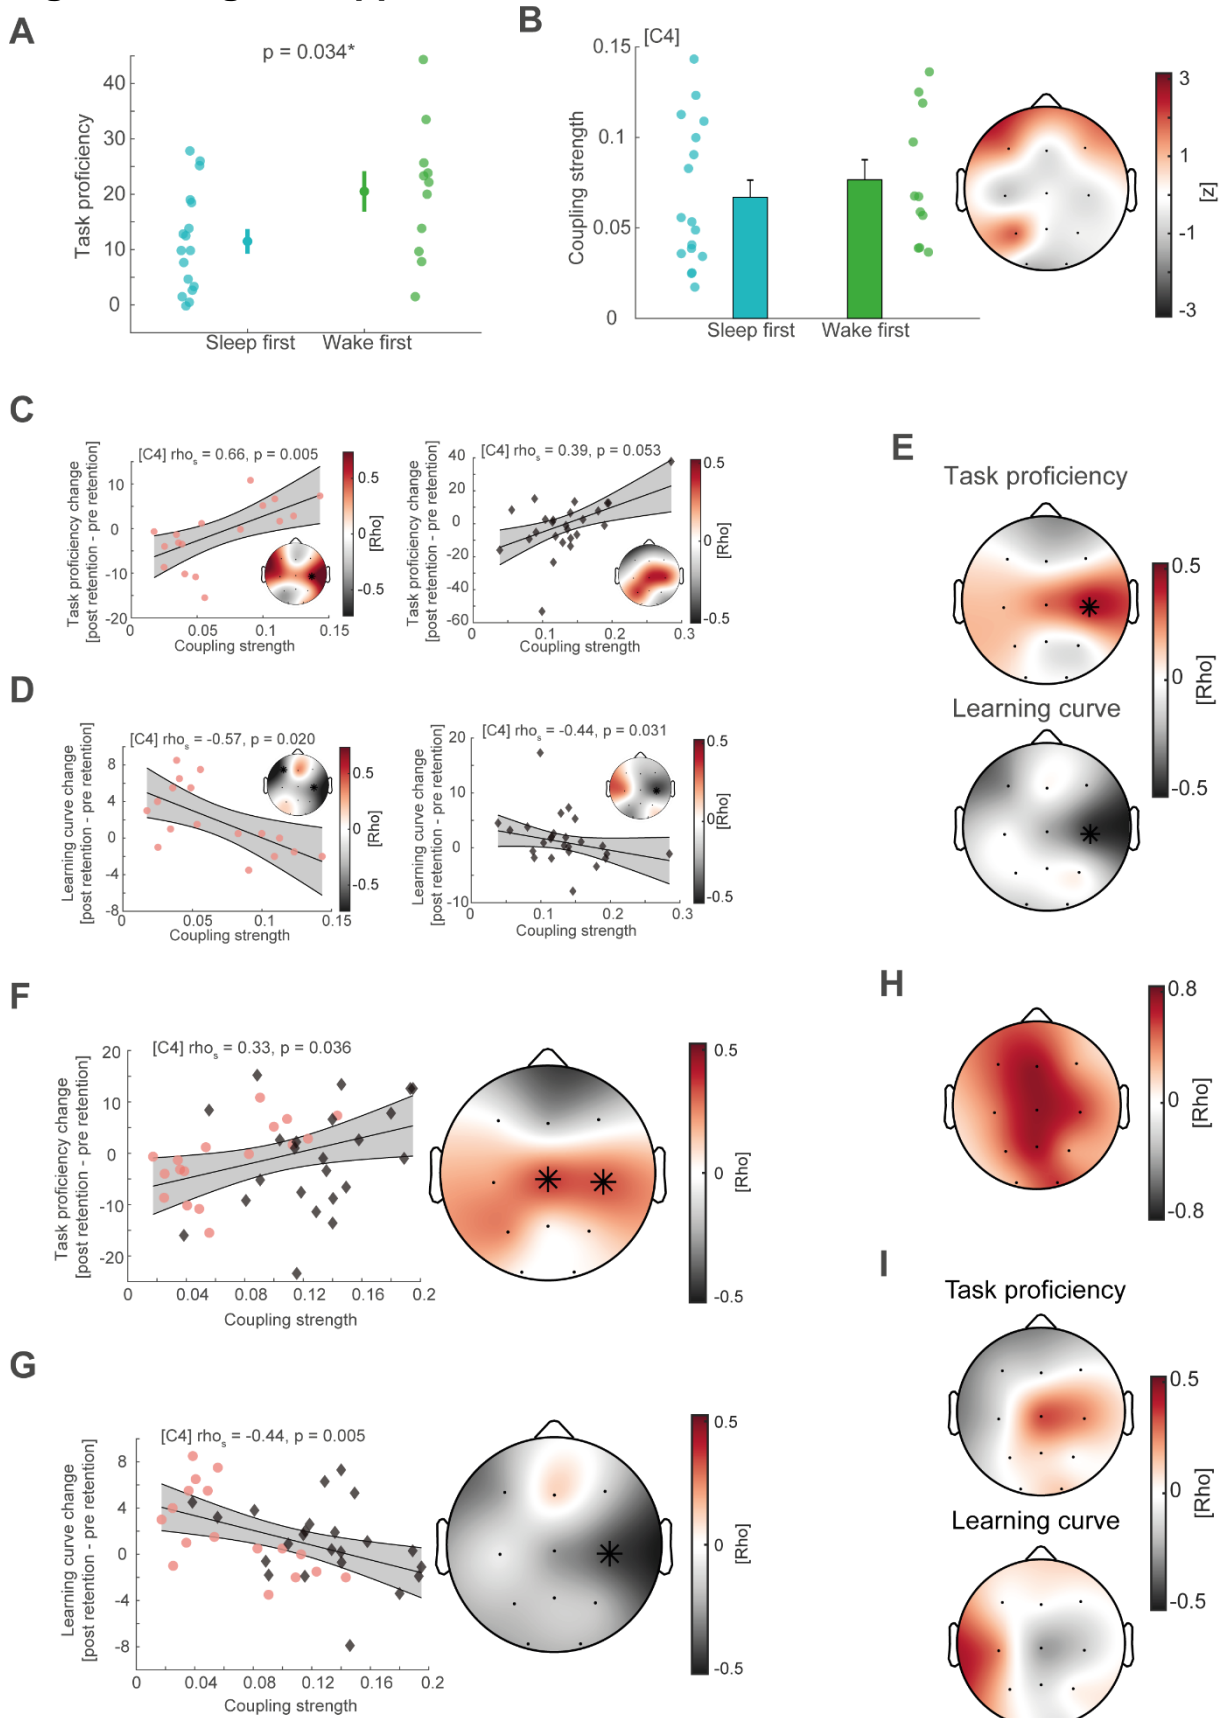

881  
 882 **(A)** Comparison of task proficiency between sleep first and wake first group after the sleep  
 883 retention interval (mean  $\pm$  SEM). Adolescents in the wake first group had higher task  
 884 proficiency given the additional juggling performance test, which also reflects additional



885 training ( $t(23) = -2.24$ ,  $p = 0.034$ ). **(B)** Comparison of SO-spindle coupling strength in the  
886 adolescent sleep first (blue) and wake first (green) group using cluster-based random  
887 permutation testing (Monte-Carlo method, cluster alpha 0.05, max size criterion, 1000  
888 iterations, critical alpha level 0.05, two-sided). Left: exemplary depiction of coupling strength  
889 at electrode C4 (mean  $\pm$  SEM). Right: z-transformed t-values plotted for all electrodes obtained  
890 from the cluster test. No significant clusters emerged. **(C)** Left: cluster-corrected correlations  
891 between individual coupling strength and overnight task proficiency change (post – pre  
892 retention) for adolescents of the sleep-first group with spearman correlation at C4, uncorrected.  
893 Asterisks indicate cluster-corrected two-sided  $p < 0.05$ . Grey-shaded area indicates 95%  
894 confidence intervals of the robust trend line. Participants with a more precise SO-spindle  
895 coordination show improved task proficiency after sleep. Right: cluster-corrected correlation of  
896 coupling strength and overnight task proficiency change for adults. Independently, adolescents  
897 and adults with higher coupling strength have better task proficiency after sleep. **(D)** Left:  
898 cluster-corrected correlation of coupling strength and overnight learning curve change for  
899 adolescents. Same conventions as in (C). Higher coupling strength related to a flatter learning  
900 curve after sleep. Right: Cluster-corrected correlation of coupling strength and overnight  
901 learning curve change for adults. Higher coupling strength related to a flatter learning curve  
902 after sleep in both age groups. **(E)** Cluster-corrected correlations for coupling strength of co-  
903 occurrence corrected events in NREM2 *and* NREM3 sleep with overnight task proficiency  
904 change (top) and overnight learning curve change (bottom). Asterisks indicate cluster-  
905 corrected two-sided  $p < 0.05$ . Similar to our original analyses (Figure 3DE) we found significant  
906 cluster-corrected correlations at C4. **(F)** Cluster-corrected correlations between individual  
907 coupling strength and overnight task proficiency change (post – pre retention) after outlier  
908 removal with spearman correlation at C4, uncorrected. Similar to our original analyses we  
909 found a significant central cluster (mean  $\rho = 0.35$ ,  $p = 0.029$ , cluster-corrected) after outlier  
910 removal. **(G)** Same conventions as in (F) but for overnight learning curve change. Similar to  
911 our original analyses we found a significant correlation at C4 ( $\rho = -0.44$ ,  $p = 0.047$ , cluster-  
912 corrected). **(H)** Topographical plot of spearman rank correlations of coupling strength in the  
913 adaptation night and learning night across all subjects. Overall coupling strength was highly  
914 correlated between the two measurements (mean  $\rho$  across all channels = 0.55), supporting  
915 the notion that coupling strength remains rather stable within the individual (i.e. trait). **(I)** To  
916 investigate a possible state-effect for coupling strength and motor learning, we calculated the  
917 difference in coupling strength between the two nights (learning night – adaptation night) and  
918 correlated these values with the overnight change in task proficiency and learning curve. We  
919 identified no significant correlations with a learning induced coupling strength change. Neither  
920 for task proficiency (top) nor learning curve change (bottom).  
921

922 **Figure 3 – figure supplement 3**

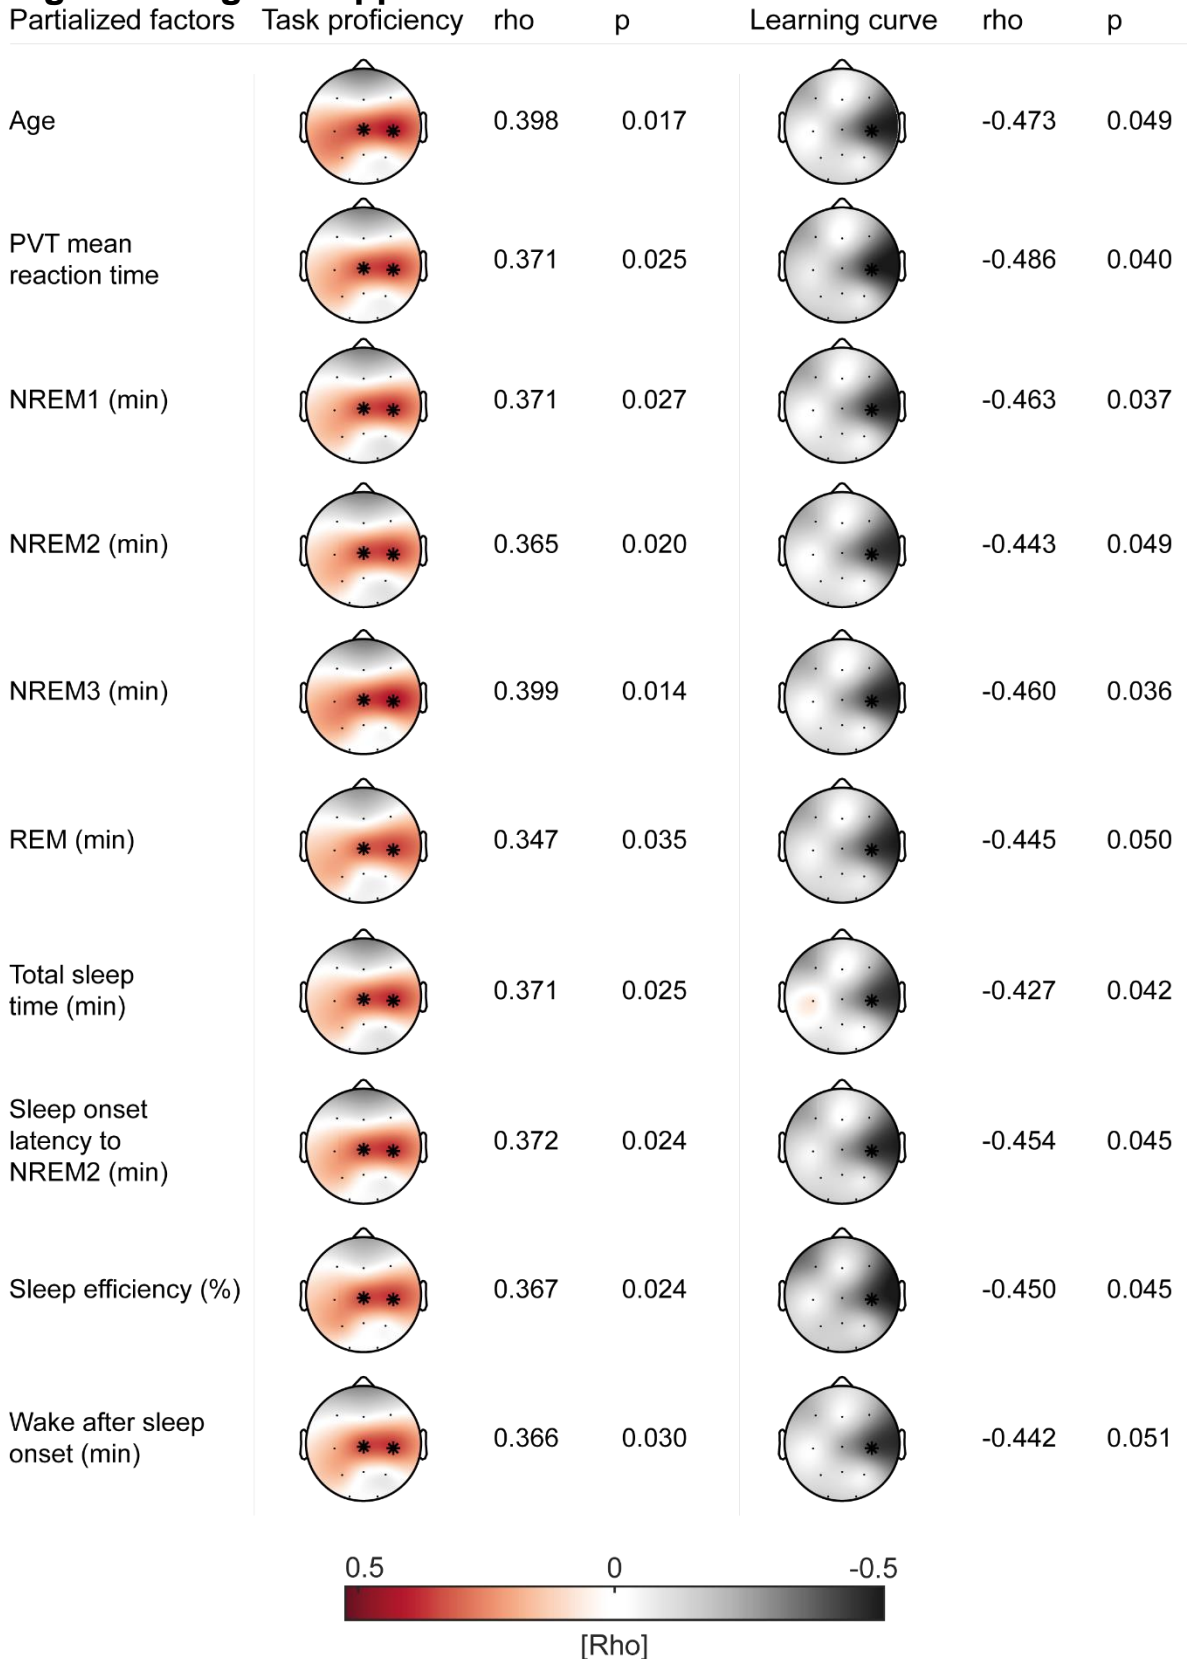

923  
 924 Summary of cluster-corrected partial correlations (Monte-Carlo method, cluster alpha 0.05,  
 925 max size criterion, 1000 iterations, critical alpha level 0.05, two-sided) of coupling strength with  
 926 task proficiency (left) and learning curve (right) controlling for possible confounding factors.  
 927 Asterisks indicate location of the detected cluster. The pattern of initial results remained highly  
 928 stable.

929 **Figure 3 – figure supplement 4**

**A**

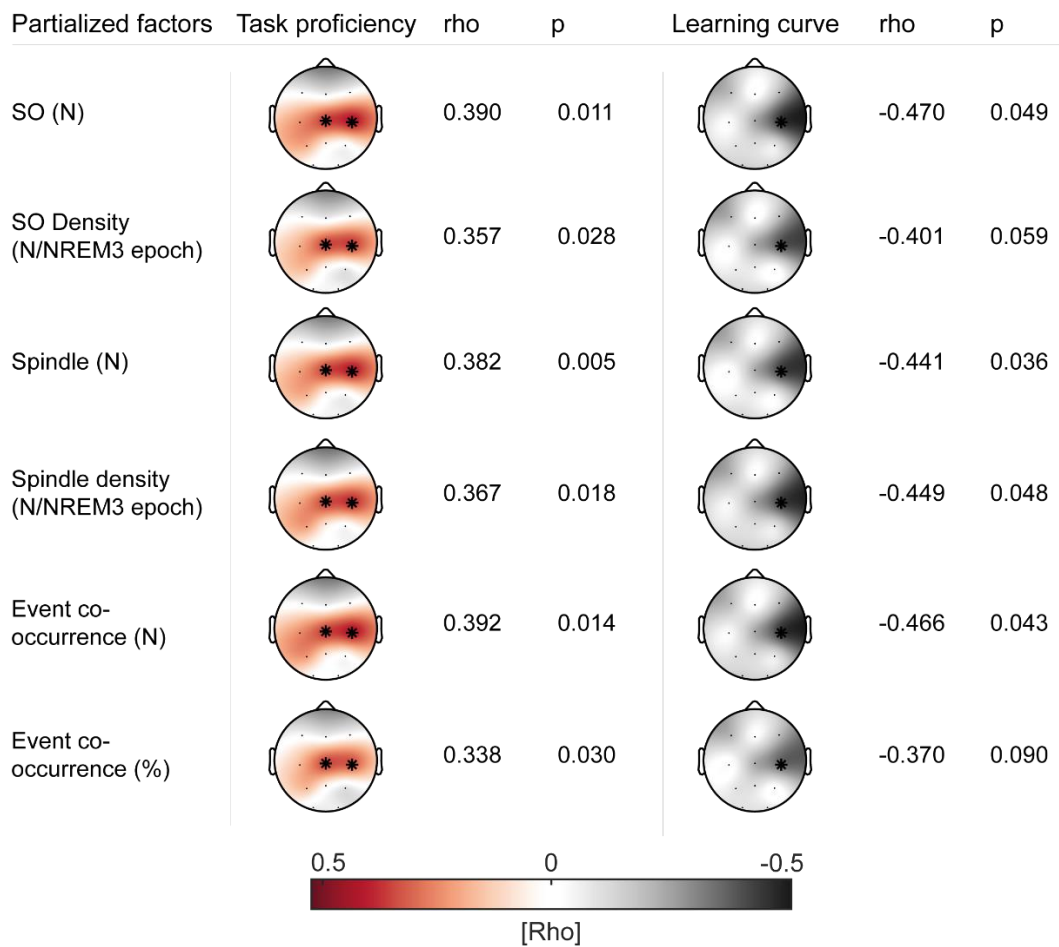

**B**

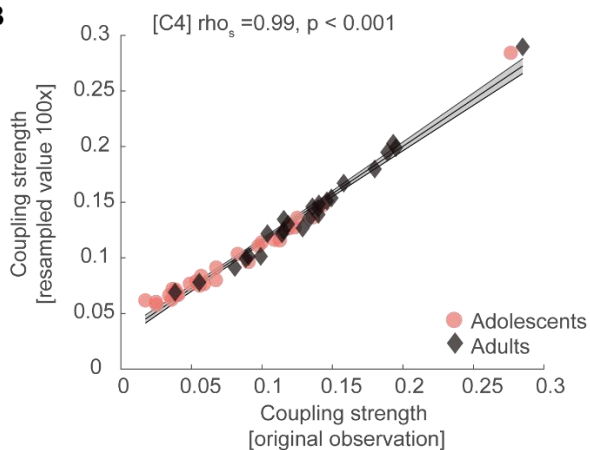

930  
 931 **(A)** Summary of cluster-corrected partial correlations of coupling strength with task proficiency  
 932 (left) and learning curve (right) controlling SO/spindle descriptive measures at critical electrode  
 933 C4. Asterisks indicate location of the detected cluster. The pattern of initial results remained  
 934 highly stable. **(B)** Spearman correlation between resampled coupling strength (N = 200, 100  
 935 iterations) and original observation of coupling strength for adolescents (red circles) and adults  
 936 (black diamonds), indicating that coupling strength is not influenced by spindle event number  
 937 if at least 200 events are present. Grey-shaded area indicates 95% confidence intervals of the  
 938 robust trend line.

939 **SUPPLEMENTARY FILE**

940

941 **Table 1 related to Figure 1.** Sleep architecture (mean  $\pm$  standard deviation) for the adaptation  
 942 and learning night collapsed across both age groups. Nights were compared using paired t-tests  
 943

| All                                | Adaptation night |              | Learning night |              | p-value          |
|------------------------------------|------------------|--------------|----------------|--------------|------------------|
| Time in bed (min)                  | 507.292          | $\pm$ 29.981 | 507.453        | $\pm$ 29.280 | 0.929            |
| Total sleep time (min)             | 471.283          | $\pm$ 40.029 | 483.915        | $\pm$ 29.737 | <b>0.001</b>     |
| Sleep onset latency to NREM2 (min) | 23.387           | $\pm$ 19.042 | 19.585         | $\pm$ 14.034 | 0.089            |
| Sleep efficiency (%)               | 92.935           | $\pm$ 5.095  | 95.524         | $\pm$ 2.802  | <b>&lt;0.001</b> |
| NREM1 (min)                        | 41.849           | $\pm$ 30.899 | 34.877         | $\pm$ 24.615 | <b>0.004</b>     |
| NREM1 (%)                          | 9.240            | $\pm$ 7.279  | 7.442          | $\pm$ 5.564  | <b>0.001</b>     |
| NREM2 (min)                        | 153.698          | $\pm$ 49.949 | 156.972        | $\pm$ 54.46  | 0.386            |
| NREM2 (%)                          | 33.100           | $\pm$ 11.622 | 32.936         | $\pm$ 12.429 | 0.826            |
| NREM3 (min)                        | 212.717          | $\pm$ 98.675 | 220.802        | $\pm$ 99.815 | 0.086            |
| NREM3 (%)                          | 44.163           | $\pm$ 18.537 | 44.829         | $\pm$ 18.604 | 0.452            |
| REM (min)                          | 63.019           | $\pm$ 21.108 | 71.264         | $\pm$ 24.536 | <b>0.007</b>     |
| REM (%)                            | 13.498           | $\pm$ 4.587  | 14.793         | $\pm$ 5.168  | <b>0.033</b>     |
| Wake after sleep onset (min)       | 17.377           | $\pm$ 16.294 | 8.689          | $\pm$ 6.708  | <b>&lt;0.001</b> |

944

945 **Table 2 related to Figure 1.** Summary of sleep architecture and SO/spindle event descriptive  
 946 measures (at electrode C4) of adolescents and adults across the whole sample (mean  $\pm$  standard  
 947 deviation) in the learning night. Independent t-tests were used for comparisons  
 948

| All                                | Adolescents |               | Adults   |               | p-value          |
|------------------------------------|-------------|---------------|----------|---------------|------------------|
| Time in bed (min)                  | 531.679     | $\pm$ 18.773  | 480.708  | $\pm$ 2.445   | <b>&lt;0.001</b> |
| Total sleep time (min)             | 506.589     | $\pm$ 20.402  | 458.438  | $\pm$ 13.550  | <b>&lt;0.001</b> |
| Sleep onset latency to NREM2 (min) | 18.821      | $\pm$ 15.632  | 20.813   | $\pm$ 12.381  | 0.617            |
| Sleep efficiency (%)               | 95.520      | $\pm$ 2.843   | 95.434   | $\pm$ 2.834   | 0.914            |
| NREM1 (min)                        | 17.839      | $\pm$ 8.592   | 55.167   | $\pm$ 22.27   | <b>&lt;0.001</b> |
| NREM1 (%)                          | 3.522       | $\pm$ 1.686   | 12.100   | $\pm$ 5.012   | <b>&lt;0.001</b> |
| NREM2 (min)                        | 124.821     | $\pm$ 49.137  | 196.104  | $\pm$ 30.804  | <b>&lt;0.001</b> |
| NREM2 (%)                          | 24.728      | $\pm$ 9.985   | 42.817   | $\pm$ 6.783   | <b>&lt;0.001</b> |
| NREM3 (min)                        | 297.482     | $\pm$ 65.336  | 130.792  | $\pm$ 43.521  | <b>&lt;0.001</b> |
| NREM3 (%)                          | 58.660      | $\pm$ 12.476  | 28.444   | $\pm$ 9.230   | <b>&lt;0.001</b> |
| REM (min)                          | 66.446      | $\pm$ 27.011  | 76.375   | $\pm$ 21.037  | 0.151            |
| REM (%)                            | 13.090      | $\pm$ 5.265   | 16.640   | $\pm$ 4.502   | <b>0.013</b>     |
| Wake after sleep onset (min)       | 7.661       | $\pm$ 6.285   | 10.125   | $\pm$ 7.108   | 0.191            |
| SO (N)                             | 3499.107    | $\pm$ 340.288 | 1855.280 | $\pm$ 632.753 | <b>&lt;0.001</b> |
| SO density (N/NREM3 epoch)         | 6.141       | $\pm$ 1.347   | 7.215    | $\pm$ 1.997   | <b>0.025</b>     |
| Spindle number (N)                 | 3506.571    | $\pm$ 742.618 | 1439.080 | $\pm$ 580.892 | <b>&lt;0.001</b> |
| Spindle density (N/NREM3 epoch)    | 5.935       | $\pm$ 0.603   | 5.383    | $\pm$ 1.159   | <b>0.032</b>     |
| Event co-occurrence (N)            | 1623.357    | $\pm$ 295.338 | 753.720  | $\pm$ 299.714 | <b>&lt;0.001</b> |
| Event co-occurrence (%)            | 47.359      | $\pm$ 8.030   | 53.745   | $\pm$ 11.424  | <b>0.021</b>     |
| Coupling strength                  | 0.071       | $\pm$ 0.038   | 0.133    | $\pm$ 0.0510  | <b>&lt;0.001</b> |

949

950

951

952

953

954 **Table 3 related to Figure 2D.** Mixed ANOVA Output comparing juggling learning curves pre- and  
 955 post retention interval 1 between the condition groups and age groups  
 956

| Effect                                     | df | F-statistic | p-value      | Effect size ( $\eta^2$ ) |
|--------------------------------------------|----|-------------|--------------|--------------------------|
| Performance test (pre-, post retention)    | 1  | 1.812       | 0.183        | 0.027                    |
| Condition group (sleep first, wake first)  | 1  | 0.082       | 0.775        | 0.001                    |
| Age group (adolescents, adults)            | 1  | 0.992       | 0.323        | 0.015                    |
| Condition group*Age group                  | 1  | 0.238       | 0.627        | 0.004                    |
| Performance test*Condition group           | 1  | 4.868       | <b>0.031</b> | 0.070                    |
| Performance test*Age group                 | 1  | 0.026       | 0.873        | < 0.001                  |
| Performance test*Condition group*Age group | 1  | 0.093       | 0.761        | 0.001                    |
| Error                                      | 65 |             |              |                          |

957  
 958 **Table 4 related to Figure 2E.** Mixed ANOVA Output comparing juggling task proficiency pre- and  
 959 post retention interval 1 between the condition groups and age groups  
 960

| Effect                                     | df | F-statistic | p-value      | Effect size ( $\eta^2$ ) |
|--------------------------------------------|----|-------------|--------------|--------------------------|
| Performance test (pre-, post retention)    | 1  | 0.153       | 0.697        | 0.002                    |
| Condition group (sleep first, wake first)  | 1  | 0.001       | 0.972        | < 0.001                  |
| Age group (adolescents, adults)            | 1  | 2.338       | 0.131        | 0.035                    |
| Condition group*Age group                  | 1  | 5.210       | <b>0.026</b> | 0.074                    |
| Performance test*Condition group           | 1  | 1.882       | 0.175        | 0.028                    |
| Performance test*Age group                 | 1  | 0.009       | 0.925        | < 0.001                  |
| Performance test*Condition group*Age group | 1  | 0.026       | 0.873        | < 0.001                  |
| Error                                      | 65 |             |              |                          |

961  
 962  
 963  
 964  
 965  
 966  
 967  
 968  
 969  
 970  
 971  
 972  
 973  
 974  
 975  
 976  
 977  
 978  
 979  
 980  
 981  
 982

983 **Table 5 related to Figure 2.** Summary of linear mixed models for predicting learning curve, PVT  
 984 mean reaction time and task proficiency separately across all performance tests and for the first  
 985 performance test only using the structure ~Age group + Time of day + (1|Subjects)  
 986

|     | Modeled                                         | Parameter           | Beta    | T-statistic | df  | p-value | Lower-95 CI | Upper-95 CI | Random effects (SD) |
|-----|-------------------------------------------------|---------------------|---------|-------------|-----|---------|-------------|-------------|---------------------|
| (A) | Learning curve (all performance tests)          | Intercept           | 2.922   | 6.832       | 202 | < 0.001 | 2.079       | 3.766       | 1.169               |
|     |                                                 | Age group adult     | -0.991  | -2.043      | 202 | 0.042   | -1.948      | -0.035      |                     |
|     |                                                 | Time of day evening | -1.129  | -2.885      | 202 | 0.004   | -1.901      | -0.357      |                     |
| (B) | Learning curve (first performance test)         | Intercept           | 2.553   | 4.544       | 66  | < 0.001 | 1.431       | 3.675       | 1.648               |
|     |                                                 | Age group adult     | -0.540  | -0.945      | 66  | 0.348   | -1.681      | 0.601       |                     |
|     |                                                 | Time of day evening | -1.294  | -2.251      | 66  | 0.028   | -2.442      | -0.146      |                     |
| (C) | Task proficiency (all performance tests)        | Intercept           | 14.747  | 5.407       | 202 | < 0.001 | 9.369       | 20.124      | 12.788              |
|     |                                                 | Age group adult     | 8.082   | 2.371       | 202 | 0.019   | 1.36        | 14.804      |                     |
|     |                                                 | Time of day evening | 2.7467  | 1.999       | 202 | 0.047   | 0.037       | 5.456       |                     |
| (D) | Task proficiency (first performance test)       | Intercept           | 12.804  | 3.791       | 66  | < 0.001 | 6.060       | 19.547      | 9.905               |
|     |                                                 | Age group adult     | 6.285   | 1.830       | 66  | 0.072   | -0.571      | 13.141      |                     |
|     |                                                 | Time of day evening | 3.470   | 1.004       | 66  | 0.318   | -3.428      | 10.369      |                     |
| (E) | PVT mean reaction time (all performance tests)  | Intercept           | 326.29  | 43.481      | 202 | < 0.001 | 311.5       | 341.09      | 32.550              |
|     |                                                 | Age group adult     | -23.762 | -2.585      | 202 | 0.010   | -41.886     | -5.639      |                     |
|     |                                                 | Time of day evening | -1.107  | -0.238      | 202 | 0.812   | -10.29      | 8.077       |                     |
| (F) | PVT mean reaction time (first performance test) | Intercept           | 311.37  | 31.469      | 66  | < 0.001 | 291.61      | 331.12      | 29.015              |
|     |                                                 | Age group adult     | -14.209 | -1.413      | 66  | 0.163   | -34.294     | 5.876       |                     |
|     |                                                 | Time of day evening | 9.622   | 0.951       | 66  | 0.345   | -10.586     | 29.831      |                     |

987  
 988 Table note: linear mixed model we computed with age group (adolescents, adults) and time of day (i.e.  
 989 performance test in the morning or evening) as fixed effects and subjects as random effects with the  
 990 fitlme.m matlab function using maximum likelihood estimation. We used reference dummy coding, where  
 991 the coefficient of the first category is set to 0 (i.e. fixed effect of age group is referenced to adolescents  
 992 whereas the Time of day fixed effect is referenced to performance tests in the morning).  
 993  
 994  
 995  
 996  
 997  
 998

999 **Table 6 related to Figure 3DE, Figure 3 – figure supplement 3 & 4.** Summary of sleep  
 1000 architecture and SO/spindle event descriptive measures (at electrode C4) of adolescents and adults in  
 1001 the sleep first group (mean ± standard deviation) in the learning night. Independent t-tests were used for  
 1002 comparisons  
 1003

| Sleep first                        | Adolescents |           | Adults   |           | p-value |
|------------------------------------|-------------|-----------|----------|-----------|---------|
| Time in bed (min)                  | 530.118     | ± 17.407  | 480.708  | ± 2.445   | <0.001  |
| Total sleep time (min)             | 502.059     | ± 19.204  | 458.438  | ± 13.550  | <0.001  |
| Sleep onset latency to NREM2 (min) | 21.794      | ± 17.474  | 20.813   | ± 12.381  | 0.834   |
| Sleep efficiency (%)               | 94.771      | ± 3.128   | 95.434   | ± 2.834   | 0.484   |
| NREM1 (min)                        | 16.088      | ± 9.805   | 55.167   | ± 22.27   | <0.001  |
| NREM1 (%)                          | 3.206       | ± 1.930   | 12.100   | ± 5.012   | <0.001  |
| NREM2 (min)                        | 115.647     | ± 54.532  | 196.104  | ± 30.804  | <0.001  |
| NREM2 (%)                          | 23.137      | ± 11.053  | 42.817   | ± 6.783   | <0.001  |
| NREM3 (min)                        | 296.147     | ± 71.121  | 130.792  | ± 43.521  | <0.001  |
| NREM3 (%)                          | 58.942      | ± 13.758  | 28.444   | ± 9.230   | <0.001  |
| REM (min)                          | 74.176      | ± 25.138  | 76.375   | ± 21.037  | 0.763   |
| REM (%)                            | 14.712      | ± 4.891   | 16.640   | ± 4.502   | 0.200   |
| Wake after sleep onset (min)       | 8.294       | ± 7.782   | 10.125   | ± 7.108   | 0.439   |
| SO (N)                             | 3498.118    | ± 318.304 | 1855.280 | ± 632.753 | <0.001  |
| SO density (N/NREM3 epoch)         | 6.226       | ± 1.508   | 7.215    | ± 1.997   | 0.091   |
| Spindle number (N)                 | 3477.294    | ± 819.27  | 1439.080 | ± 580.892 | <0.001  |
| Spindle density (N/NREM3 epoch)    | 5.915       | ± 0.669   | 5.383    | ± 1.159   | 0.096   |
| Event co-occurrence (N)            | 1617.941    | ± 337.016 | 753.720  | ± 299.714 | <0.001  |
| Event co-occurrence (%)            | 47.709      | ± 8.546   | 53.745   | ± 11.424  | 0.071   |
| Coupling strength                  | 0.067       | ± 0.039   | 0.133    | ± 0.0510  | <0.001  |

1004 **Table 7 related to Figure 3 – figure supplement 2AB.** Summary of sleep architecture and  
 1005 SO/spindle event descriptive measures (at electrode C4) of adolescents in the sleep first and wake first  
 1006 group (mean ± standard deviation). Independent t-tests were used for comparisons  
 1007  
 1008

| Adolescents                        | Sleep first |           | Wake first |           | p-value      |
|------------------------------------|-------------|-----------|------------|-----------|--------------|
| Time in bed (min)                  | 530.118     | ± 17.407  | 534.091    | ± 21.359  | 0.594        |
| Total sleep time (min)             | 502.059     | ± 19.204  | 513.591    | ± 21.095  | 0.147        |
| Sleep onset latency to NREM2 (min) | 21.794      | ± 17.474  | 14.227     | ± 11.531  | 0.217        |
| Sleep efficiency (%)               | 94.771      | ± 3.128   | 96.677     | ± 1.937   | 0.083        |
| NREM1 (min)                        | 16.088      | ± 9.805   | 20.545     | ± 5.677   | 0.185        |
| NREM1 (%)                          | 3.206       | ± 1.930   | 4.009      | ± 1.136   | 0.225        |
| NREM2 (min)                        | 115.647     | ± 54.532  | 139.000    | ± 37.374  | 0.226        |
| NREM2 (%)                          | 23.137      | ± 11.053  | 27.187     | ± 7.921   | 0.303        |
| NREM3 (min)                        | 296.147     | ± 71.121  | 299.545    | ± 58.524  | 0.896        |
| NREM3 (%)                          | 58.942      | ± 13.758  | 58.224     | ± 10.818  | 0.885        |
| REM (min)                          | 74.176      | ± 25.138  | 54.500     | ± 26.462  | 0.058        |
| REM (%)                            | 14.712      | ± 4.891   | 10.583     | ± 5.018   | <b>0.040</b> |
| Wake after sleep onset (min)       | 8.294       | ± 7.782   | 6.682      | ± 2.831   | 0.518        |
| SO (N)                             | 3498.118    | ± 318.304 | 3500.636   | ± 387.991 | 0.985        |
| SO density (N/NREM3 epoch)         | 6.226       | ± 1.508   | 6.010      | ± 1.109   | 0.687        |
| Spindle number (N)                 | 3477.294    | ± 819.27  | 3551.818   | ± 641.377 | 0.801        |
| Spindle density (N/NREM3 epoch)    | 5.915       | ± 0.669   | 5.965      | ± 0.512   | 0.835        |
| Event co-occurrence (N)            | 1617.941    | ± 337.016 | 1631.727   | ± 231.629 | 0.907        |
| Event co-occurrence (%)            | 47.709      | ± 8.546   | 46.818     | ± 7.531   | 0.780        |
| Coupling strength                  | 0.067       | ± 0.039   | 0.077      | ± 0.037   | 0.515        |

1009

## 1010 REFERENCES

- 1011 Albouy, G., King, B. R., Maquet, P., & Doyon, J. (2013). Hippocampus and striatum: dynamics  
1012 and interaction during acquisition and sleep-related motor sequence memory  
1013 consolidation. *Hippocampus*, 23(11), 985-1004. <https://doi.org/10.1002/hipo.22183>
- 1014 Aru, J., Aru, J., Priesemann, V., Wibral, M., Lana, L., Pipa, G., Singer, W., & Vicente, R. (2015).  
1015 Untangling cross-frequency coupling in neuroscience. *Current Opinion in*  
1016 *Neurobiology*, 31, 51-61. <https://doi.org/10.1016/j.conb.2014.08.002>
- 1017 Barakat, M., Doyon, J., Debas, K., Vandewalle, G., Morin, A., Poirier, G., Martin, N., Lafortune,  
1018 M., Karni, A., Ungerleider, L. G., Benali, H., & Carrier, J. (2011). Fast and slow spindle  
1019 involvement in the consolidation of a new motor sequence. *Behavioural Brain*  
1020 *Research*, 217(1), 117-121. <https://doi.org/10.1016/j.bbr.2010.10.019>
- 1021 Berens, P. (2009). CircStat: A MATLAB Toolbox for Circular Statistics. *Journal of Statistical*  
1022 *Software*, 31(10), 1-21. <Go to ISI>://WOS:000270513700001
- 1023 Bothe, K., Hirschauer, F., Wiesinger, H. P., Edfelder, J., Gruber, G., Birklbauer, J., & Hoedlmoser,  
1024 K. (2019). The impact of sleep on complex gross-motor adaptation in adolescents.  
1025 *Journal of Sleep Research*, 28(4). <https://doi.org/10.1111/jsr.12797>
- 1026 Bothe, K., Hirschauer, F., Wiesinger, H. P., Edfelder, J. M., Gruber, G., Hoedlmoser, K., &  
1027 Birklbauer, J. (2020). Gross motor adaptation benefits from sleep after training. *Journal*  
1028 *of Sleep Research*, 29(5), e12961. <https://doi.org/10.1111/jsr.12961>
- 1029 Boutin, A., Pinsard, B., Bore, A., Carrier, J., Fogel, S. M., & Doyon, J. (2018). Transient  
1030 synchronization of hippocampo-striato-thalamo-cortical networks during sleep spindle  
1031 oscillations induces motor memory consolidation. *Neuroimage*, 169, 419-430.  
1032 <https://doi.org/10.1016/j.neuroimage.2017.12.066>
- 1033 Boyke, J., Driemeyer, J., Gaser, C., Buchel, C., & May, A. (2008). Training-induced brain  
1034 structure changes in the elderly. *Journal of Neuroscience*, 28(28), 7031-7035.  
1035 <https://doi.org/10.1523/JNEUROSCI.0742-08.2008>
- 1036 Campbell, I. G., & Feinberg, I. (2009). Longitudinal trajectories of non-rapid eye movement  
1037 delta and theta EEG as indicators of adolescent brain maturation. *Proceedings of the*  
1038 *National Academy of Sciences of the United States of America*, 106(13), 5177-5180.  
1039 <https://doi.org/10.1073/pnas.0812947106>
- 1040 Campbell, I. G., & Feinberg, I. (2016). Maturation Patterns of Sigma Frequency Power Across  
1041 Childhood and Adolescence: A Longitudinal Study. *Sleep*, 39(1), 193-201.  
1042 <https://doi.org/10.5665/sleep.5346>
- 1043 Chauvette, S., Seigneur, J., & Timofeev, I. (2012). Sleep oscillations in the thalamocortical  
1044 system induce long-term neuronal plasticity. *Neuron*, 75(6), 1105-1113.  
1045 <https://doi.org/10.1016/j.neuron.2012.08.034>
- 1046 Clemens, Z., Molle, M., Eross, L., Jakus, R., Rasonyi, G., Halasz, P., & Born, J. (2011). Fine-tuned  
1047 coupling between human parahippocampal ripples and sleep spindles. *European*  
1048 *Journal of Neuroscience*, 33(3), 511-520. [https://doi.org/10.1111/j.1460-](https://doi.org/10.1111/j.1460-9568.2010.07505.x)  
1049 [9568.2010.07505.x](https://doi.org/10.1111/j.1460-9568.2010.07505.x)
- 1050 Cole, S. R., & Voytek, B. (2017). Brain Oscillations and the Importance of Waveform Shape.  
1051 *Trends in Cognitive Sciences*, 21(2), 137-149.  
1052 <https://doi.org/10.1016/j.tics.2016.12.008>
- 1053 Dayan, E., & Cohen, L. G. (2011). Neuroplasticity subserving motor skill learning. *Neuron*, 72(3),  
1054 443-454. <https://doi.org/10.1016/j.neuron.2011.10.008>



- 1055 Delorme, A., & Makeig, S. (2004). EEGLAB: an open source toolbox for analysis of single-trial  
1056 EEG dynamics including independent component analysis. *Journal of Neuroscience*  
1057 *Methods*, 134(1), 9-21. <https://doi.org/10.1016/j.jneumeth.2003.10.009>
- 1058 Diekelmann, S., & Born, J. (2010). The memory function of sleep. *Nature Reviews:*  
1059 *Neuroscience*, 11(2), 114-126. <https://doi.org/10.1038/nrn2762>
- 1060 Dinges, D. F., & Powell, J. W. (1985). Microcomputer Analyses of Performance on a Portable,  
1061 Simple Visual Rt Task during Sustained Operations. *Behavior Research Methods*  
1062 *Instruments & Computers*, 17(6), 652-655. <https://doi.org/10.3758/Bf03200977>
- 1063 Doyon, J., & Benali, H. (2005). Reorganization and plasticity in the adult brain during learning  
1064 of motor skills. *Current Opinion in Neurobiology*, 15(2), 161-167.  
1065 <https://doi.org/10.1016/j.conb.2005.03.004>
- 1066 Doyon, J., Gabbitov, E., Vahdat, S., Lungu, O., & Boutin, A. (2018). Current issues related to  
1067 motor sequence learning in humans. *Current Opinion in Behavioral Sciences*, 20, 89-97.  
1068 <https://doi.org/10.1016/j.cobeha.2017.11.012>
- 1069 Draganski, B., Gaser, C., Busch, V., Schuierer, G., Bogdahn, U., & May, A. (2004).  
1070 Neuroplasticity: changes in grey matter induced by training. *Nature*, 427(6972), 311-  
1071 312. <https://doi.org/10.1038/427311a>
- 1072 Dvorak, D., & Fenton, A. A. (2014). Toward a proper estimation of phase-amplitude coupling  
1073 in neural oscillations. *Journal of Neuroscience Methods*, 225, 42-56.  
1074 <https://doi.org/10.1016/j.jneumeth.2014.01.002>
- 1075 Flinker, A., Korzeniewska, A., Shestiyuk, A. Y., Franaszczuk, P. J., Dronkers, N. F., Knight, R. T.,  
1076 & Crone, N. E. (2015). Redefining the role of Broca's area in speech. *Proceedings of the*  
1077 *National Academy of Sciences of the United States of America*, 112(9), 2871-2875.  
1078 <https://doi.org/10.1073/pnas.1414491112>
- 1079 Fogel, S., Albouy, G., King, B. R., Lungu, O., Vien, C., Bore, A., Pinsard, B., Benali, H., Carrier, J.,  
1080 & Doyon, J. (2017). Reactivation or transformation? Motor memory consolidation  
1081 associated with cerebral activation time-locked to sleep spindles. *PLoS One*, 12(4),  
1082 e0174755. <https://doi.org/10.1371/journal.pone.0174755>
- 1083 Gudberg, C., & Johansen-Berg, H. (2015). Sleep and Motor Learning: Implications for Physical  
1084 Rehabilitation After Stroke. *Frontiers in Neurology*, 6, 241.  
1085 <https://doi.org/10.3389/fneur.2015.00241>
- 1086 Hahn, M., Heib, D., Schabus, M., Hoedlmoser, K., & Helfrich, R. F. (2020). Slow oscillation-  
1087 spindle coupling predicts enhanced memory formation from childhood to  
1088 adolescence. *Elife*, 9. <https://doi.org/10.7554/eLife.53730>
- 1089 Helfrich, R. F., Lendner, J. D., & Knight, R. T. (2021). Aperiodic sleep networks promote memory  
1090 consolidation. *Trends in Cognitive Sciences*. <https://doi.org/10.1016/j.tics.2021.04.009>
- 1091 Helfrich, R. F., Lendner, J. D., Mander, B. A., Guillen, H., Paff, M., Mnatsakanyan, L., Vadera, S.,  
1092 Walker, M. P., Lin, J. J., & T., K. R. (2019). Bidirectional prefrontal-hippocampal  
1093 dynamics organize information transfer during sleep in humans. *Nature*  
1094 *Communications*, 10(1), 3572. <https://doi.org/10.1038/s41467-019-11444-x>
- 1095 Helfrich, R. F., Mander, B. A., Jagust, W. J., Knight, R. T., & Walker, M. P. (2018). Old Brains  
1096 Come Uncoupled in Sleep: Slow Wave-Spindle Synchrony, Brain Atrophy, and  
1097 Forgetting. *Neuron*, 97(1), 221-230 e224.  
1098 <https://doi.org/10.1016/j.neuron.2017.11.020>
- 1099 Huber, R., Ghilardi, M. F., Massimini, M., & Tononi, G. (2004). Local sleep and learning. *Nature*,  
1100 430(6995), 78-81. <https://doi.org/10.1038/nature02663>

- 1101 Iber, C., Ancoli-Israel, S., Chesson, A., & Quan, S. F. (2007). *The AASM Manual for the Scoring*  
1102 *of Sleep and Associated Events: Rules, Terminology, and Technical Specification* (2 ed.).  
1103 American Academy of Sleep Medicine.
- 1104 Joechner, A. K., Wehmeier, S., & Werkle-Bergner, M. (2021). Electrophysiological indicators of  
1105 sleep-associated memory consolidation in 5- to 6-year-old children. *Psychophysiology*,  
1106 e13829. <https://doi.org/10.1111/psyp.13829>
- 1107 King, B. R., Hoedlmoser, K., Hirschauer, F., Dolfen, N., & Albouy, G. (2017). Sleeping on the  
1108 motor engram: The multifaceted nature of sleep-related motor memory consolidation.  
1109 *Neuroscience and Biobehavioral Reviews*, 80, 1-22.  
1110 <https://doi.org/10.1016/j.neubiorev.2017.04.026>
- 1111 Klinzing, J. G., Niethard, N., & Born, J. (2019). Mechanisms of systems memory consolidation  
1112 during sleep. *Nature Neuroscience*, 22(10), 1598-1610.  
1113 <https://doi.org/10.1038/s41593-019-0467-3>
- 1114 Latchoumane, C. V., Ngo, H. V., Born, J., & Shin, H. S. (2017). Thalamic Spindles Promote  
1115 Memory Formation during Sleep through Triple Phase-Locking of Cortical, Thalamic,  
1116 and Hippocampal Rhythms. *Neuron*, 95(2), 424-435 e426.  
1117 <https://doi.org/10.1016/j.neuron.2017.06.025>
- 1118 Maris, E., & Oostenveld, R. (2007). Nonparametric statistical testing of EEG- and MEG-data.  
1119 *Journal of Neuroscience Methods*, 164(1), 177-190.  
1120 <https://doi.org/10.1016/j.jneumeth.2007.03.024>
- 1121 Mikutta, C., Feige, B., Maier, J. G., Hertenstein, E., Holz, J., Riemann, D., & Nissen, C. (2019).  
1122 Phase-amplitude coupling of sleep slow oscillatory and spindle activity correlates with  
1123 overnight memory consolidation. *Journal of Sleep Research*.  
1124 <https://doi.org/10.1111/jsr.12835>
- 1125 Molle, M., Bergmann, T. O., Marshall, L., & Born, J. (2011). Fast and slow spindles during the  
1126 sleep slow oscillation: disparate coalescence and engagement in memory processing.  
1127 *Sleep*, 34(10), 1411-1421. <https://doi.org/10.5665/sleep.1290>
- 1128 Morita, Y., Ogawa, K., & Uchida, S. (2012). The effect of a daytime 2-hour nap on complex  
1129 motor skill learning. *Sleep and Biological Rhythms*, 10(4), 302-309.  
1130 <https://doi.org/10.1111/j.1479-8425.2012.00576.x>
- 1131 Morita, Y., Ogawa, K., & Uchida, S. (2016). Napping after complex motor learning enhances  
1132 juggling performance. *Sleep Science*, 9(2), 112-116.  
1133 <https://doi.org/10.1016/j.slsci.2016.04.002>
- 1134 Muehlroth, B. E., Sander, M. C., Fandakova, Y., Grandy, T. H., Rasch, B., Shing, Y. L., & Werkle-  
1135 Bergner, M. (2019). Precise Slow Oscillation-Spindle Coupling Promotes Memory  
1136 Consolidation in Younger and Older Adults. *Scientific Reports*, 9(1), 1940.  
1137 <https://doi.org/10.1038/s41598-018-36557-z>
- 1138 Muehlroth, B. E., & Werkle-Bergner, M. (2020). Understanding the interplay of sleep and  
1139 aging: Methodological challenges. *Psychophysiology*, 57(3), e13523.  
1140 <https://doi.org/10.1111/psyp.13523>
- 1141 Ngo, H. V., Fell, J., & Staresina, B. (2020). Sleep spindles mediate hippocampal-neocortical  
1142 coupling during long-duration ripples. *Elife*, 9. <https://doi.org/10.7554/eLife.57011>
- 1143 Nicolas, A., Petit, D., Rompre, S., & Montplaisir, J. (2001). Sleep spindle characteristics in  
1144 healthy subjects of different age groups. *Clinical Neurophysiology*, 112(3), 521-527.  
1145 <https://www.ncbi.nlm.nih.gov/pubmed/11222974>
- 1146 Niethard, N., Ngo, H. V. V., Ehrlich, I., & Born, J. (2018). Cortical circuit activity underlying sleep  
1147 slow oscillations and spindles. *Proceedings of the National Academy of Sciences of the*

- 1148 *United States of America*, 115(39), E9220-E9229.  
1149 <https://doi.org/10.1073/pnas.1805517115>
- 1150 Nishida, M., & Walker, M. P. (2007). Daytime naps, motor memory consolidation and  
1151 regionally specific sleep spindles. *PloS One*, 2(4), e341.  
1152 <https://doi.org/10.1371/journal.pone.0000341>
- 1153 Oostenveld, R., Fries, P., Maris, E., & Schoffelen, J. M. (2011). FieldTrip: Open source software  
1154 for advanced analysis of MEG, EEG, and invasive electrophysiological data.  
1155 *Computational Intelligence and Neuroscience*, 2011, 156869.  
1156 <https://doi.org/10.1155/2011/156869>
- 1157 Pinsard, B., Boutin, A., Gabitov, E., Lungu, O., Benali, H., & Doyon, J. (2019). Consolidation  
1158 alters motor sequence-specific distributed representations. *Elife*, 8.  
1159 <https://doi.org/10.7554/eLife.39324>
- 1160 Purcell, S. M., Manoach, D. S., Demanuele, C., Cade, B. E., Mariani, S., Cox, R.,  
1161 Panagiotaropoulou, G., Saxena, R., Pan, J. Q., Smoller, J. W., Redline, S., & Stickgold, R.  
1162 (2017). Characterizing sleep spindles in 11,630 individuals from the National Sleep  
1163 Research Resource. *Nature Communications*, 8, 15930.  
1164 <https://doi.org/10.1038/ncomms15930>
- 1165 Rosanova, M., & Ulrich, D. (2005). Pattern-specific associative long-term potentiation induced  
1166 by a sleep spindle-related spike train. *Journal of Neuroscience*, 25(41), 9398-9405.  
1167 <https://doi.org/10.1523/JNEUROSCI.2149-05.2005>
- 1168 Saletu, B., Wessely, P., Grünberger, J., & Schultes, M. (1987). Erste klinische Erfahrungen mit  
1169 einem neuen schlafanstoßenden Benzodiazepin, Cinolazepam, mittels eines  
1170 Selbstbeurteilungsbogens für Schlaf- und Aufwachqualität (SSA). *Neuropsychiatrie.*, 1,  
1171 169 - 176.
- 1172 Sawangjit, A., Oyanedel, C. N., Niethard, N., Salazar, C., Born, J., & Inostroza, M. (2018). The  
1173 hippocampus is crucial for forming non-hippocampal long-term memory during sleep.  
1174 *Nature*, 564(7734), 109-+. <https://doi.org/10.1038/s41586-018-0716-8>
- 1175 Schapiro, A. C., Reid, A. G., Morgan, A., Manoach, D. S., Verfaellie, M., & Stickgold, R. (2019).  
1176 The hippocampus is necessary for the consolidation of a task that does not require the  
1177 hippocampus for initial learning. *Hippocampus*, 29(11), 1091-1100.  
1178 <https://doi.org/10.1002/hipo.23101>
- 1179 Scheffer-Teixeira, R., & Tort, A. B. (2016). On cross-frequency phase-phase coupling between  
1180 theta and gamma oscillations in the hippocampus. *Elife*, 5.  
1181 <https://doi.org/10.7554/eLife.20515>
- 1182 Schreiner, T., Petzka, M., Staudigl, T., & Staresina, B. P. (2021). Endogenous memory  
1183 reactivation during sleep in humans is clocked by slow oscillation-spindle complexes.  
1184 *Nature Communications*, 12(1). <https://doi.org/ARTN> 3112  
1185 10.1038/s41467-021-23520-2
- 1186 Siengsuhon, C. F., & Boyd, L. A. (2008). Sleep enhances implicit motor skill learning in  
1187 individuals poststroke. *Topics in Stroke Rehabilitation*, 15(1), 1-12.  
1188 <https://doi.org/10.1310/tsr1501-1>
- 1189 Silversmith, D. B., Lemke, S. M., Egert, D., Berke, J. D., & Ganguly, K. (2020). The Degree of  
1190 Nesting between Spindles and Slow Oscillations Modulates Neural Synchrony. *Journal*  
1191 *of Neuroscience*, 40(24), 4673-4684. [https://doi.org/10.1523/JNEUROSCI.2682-](https://doi.org/10.1523/JNEUROSCI.2682-19.2020)  
1192 [19.2020](https://doi.org/10.1523/JNEUROSCI.2682-19.2020)
- 1193 Staresina, B. P., Bergmann, T. O., Bonnefond, M., van der Meij, R., Jensen, O., Deuker, L., Elger,  
1194 C. E., Axmacher, N., & Fell, J. (2015). Hierarchical nesting of slow oscillations, spindles

- 1195 and ripples in the human hippocampus during sleep. *Nature Neuroscience*, 18(11),  
1196 1679-1686. <https://doi.org/10.1038/nn.4119>
- 1197 Tamaki, M., Huang, T. R., Yotsumoto, Y., Hamalainen, M., Lin, F. H., Nanez, J. E., Sr., Watanabe,  
1198 T., & Sasaki, Y. (2013). Enhanced spontaneous oscillations in the supplementary motor  
1199 area are associated with sleep-dependent offline learning of finger-tapping motor-  
1200 sequence task. *Journal of Neuroscience*, 33(34), 13894-13902.  
1201 <https://doi.org/10.1523/JNEUROSCI.1198-13.2013>
- 1202 Tamaki, M., Matsuoka, T., Nittono, H., & Hori, T. (2008). Fast sleep spindle (13-15 Hz) activity  
1203 correlates with sleep-dependent improvement in visuomotor performance. *Sleep*,  
1204 31(2), 204-211. <https://www.ncbi.nlm.nih.gov/pubmed/18274267>
- 1205 Vahdat, S., Fogel, S., Benali, H., & Doyon, J. (2017). Network-wide reorganization of procedural  
1206 memory during NREM sleep revealed by fMRI. *Elife*, 6.  
1207 <https://doi.org/10.7554/eLife.24987>
- 1208 Walker, M. P., Brakefield, T., Morgan, A., Hobson, J. A., & Stickgold, R. (2002). Practice with  
1209 sleep makes perfect: sleep-dependent motor skill learning. *Neuron*, 35(1), 205-211.
- 1210 Wen, H., & Liu, Z. (2016). Separating Fractal and Oscillatory Components in the Power  
1211 Spectrum of Neurophysiological Signal. *Brain Topography*, 29(1), 13-26.  
1212 <https://doi.org/10.1007/s10548-015-0448-0>
- 1213 Wilhelm, I., Metzko-Meszaros, M., Knapp, S., & Born, J. (2012). Sleep-dependent  
1214 consolidation of procedural motor memories in children and adults: the pre-sleep level  
1215 of performance matters. *Developmental Science*, 15(4), 506-515.  
1216 <https://doi.org/10.1111/j.1467-7687.2012.01146.x>
- 1217 Wilson, M. A., & McNaughton, B. L. (1994). Reactivation of hippocampal ensemble memories  
1218 during sleep. *Science*, 265(5172), 676-679. <https://doi.org/10.1126/science.8036517>
- 1219 Xu, W., De Carvalho, F., Clarke, A. K., & Jackson, A. (2020). Communication from the  
1220 cerebellum to the neocortex during sleep spindles. *Progress in Neurobiology*, 101940.  
1221 <https://doi.org/10.1016/j.pneurobio.2020.101940>
- 1222 Zhang, H., Fell, J., & Axmacher, N. (2018). Electrophysiological mechanisms of human memory  
1223 consolidation. *Nature Communications*, 9(1), 4103. [https://doi.org/10.1038/s41467-  
1224 018-06553-y](https://doi.org/10.1038/s41467-018-06553-y)
